# Supplementary material
Source: ML conference proceedings conference paper supplement (https://proceedings.neurips.cc/paper_files/paper/2011/hash/692f93be8c7a41525c0baf2076aecfb4-Abstract.html)
Supplement: Supplementary file 1 [file 692f93be8c7a41525c0baf2076aecfb4-Supplemental.zip]

## A Proofs

**Proof of Theorem 1.** The proof is identical to that in [10]. For simplicity, denote  $\psi(x_{1:T}) = \inf_{f \in \mathcal{F}} \sum_{t=1}^T f(x_t)$ . The first step in the proof is to appeal to the minimax theorem for every couple of inf and sup:

$$\begin{aligned} & \inf_{q_1 \in \mathcal{Q}} \sup_{p_1 \in \mathcal{P}_1} \mathbb{E}_{\substack{f_1 \sim q_1 \\ x_1 \sim p_1}} \cdots \inf_{q_T \in \mathcal{Q}} \sup_{p_T \in \mathcal{P}_T} \mathbb{E}_{\substack{f_T \sim q_T \\ x_T \sim p_T}} \left[ \sum_{t=1}^T f_t(x_t) - \psi(x_{1:T}) \right] \\ &= \sup_{p_1 \in \mathcal{P}_1} \inf_{q_1 \in \mathcal{Q}} \mathbb{E}_{\substack{f_1 \sim q_1 \\ x_1 \sim p_1}} \cdots \sup_{p_T \in \mathcal{P}_T} \inf_{q_T \in \mathcal{Q}} \mathbb{E}_{\substack{f_T \sim q_T \\ x_T \sim p_T}} \left[ \sum_{t=1}^T f_t(x_t) - \psi(x_{1:T}) \right] \\ &= \sup_{p_1 \in \mathcal{P}_1} \inf_{f_1 \in \mathcal{F}} \mathbb{E}_{x_1 \sim p_1} \cdots \sup_{p_T \in \mathcal{P}_T} \inf_{f_T \in \mathcal{F}} \mathbb{E}_{x_T \sim p_T} \left[ \sum_{t=1}^T f_t(x_t) - \psi(x_{1:T}) \right] \end{aligned}$$

From now on, it will be understood that  $x_t$  has distribution  $p_t$  and that the suprema over  $p_t$  are in fact over  $p_t \in \mathcal{P}_t(x_{1:t-1})$ . By moving the expectation with respect to  $x_T$  and then the infimum with respect to  $f_T$  inside the expression, we arrive at

$$\begin{aligned} & \sup_{p_1} \inf_{f_1} \mathbb{E}_{x_1} \cdots \sup_{p_{T-1}} \inf_{f_{T-1}} \mathbb{E}_{x_{T-1}} \sup_{p_T} \left[ \sum_{t=1}^{T-1} f_t(x_t) + \left[ \inf_{f_T} \mathbb{E}_{x_T} f_T(x_T) \right] - \mathbb{E}_{x_T} \psi(x_{1:T}) \right] \\ &= \sup_{p_1} \inf_{f_1} \mathbb{E}_{x_1} \cdots \sup_{p_{T-1}} \inf_{f_{T-1}} \mathbb{E}_{x_{T-1}} \sup_{p_T} \mathbb{E}_{x_T} \left[ \sum_{t=1}^{T-1} f_t(x_t) + \left[ \inf_{f_T} \mathbb{E}_{x_T} f_T(x_T) \right] - \psi(x_{1:T}) \right] \end{aligned}$$

Let us now repeat the procedure for step  $T-1$ . The above expression is equal to

$$\begin{aligned} & \sup_{p_1} \inf_{f_1} \mathbb{E}_{x_1} \cdots \sup_{p_{T-1}} \inf_{f_{T-1}} \mathbb{E}_{x_{T-1}} \left[ \sum_{t=1}^{T-1} f_t(x_t) + \sup_{p_T} \mathbb{E}_{x_T} \left[ \inf_{f_T} \mathbb{E}_{x_T} f_T(x_T) - \psi(x_{1:T}) \right] \right] \\ &= \sup_{p_1} \inf_{f_1} \mathbb{E}_{x_1} \cdots \sup_{p_{T-1}} \left[ \sum_{t=1}^{T-2} f_t(x_t) + \left[ \inf_{f_{T-1}} \mathbb{E}_{x_{T-1}} f_{T-1}(x_{T-1}) \right] + \mathbb{E}_{x_{T-1}} \sup_{p_T} \mathbb{E}_{x_T} \left[ \inf_{f_T} \mathbb{E}_{x_T} f_T(x_T) - \psi(x_{1:T}) \right] \right] \\ &= \sup_{p_1} \inf_{f_1} \mathbb{E}_{x_1} \cdots \sup_{p_{T-1}} \mathbb{E}_{x_{T-1}} \sup_{p_T} \mathbb{E}_{x_T} \left[ \sum_{t=1}^{T-2} f_t(x_t) + \left[ \inf_{f_{T-1}} \mathbb{E}_{x_{T-1}} f_{T-1}(x_{T-1}) \right] + \left[ \inf_{f_T} \mathbb{E}_{x_T} f_T(x_T) \right] - \psi(x_{1:T}) \right] \end{aligned}$$

Continuing in this fashion for  $T-2$  and all the way down to  $t=1$  proves the theorem.  $\square$

**Proof of Proposition 2.** Even though Theorem 1 shows equality to some quantity with a supremum over oblivious strategies  $\mathbf{p}$ , it is not immediate that there exists an oblivious minimax strategy for the adversary, and a proof is required. To this end, for any oblivious strategy  $\mathbf{p}$ , define the regret the player would get playing optimally against  $\mathbf{p}$ :

$$\mathcal{V}_T^{\mathbf{p}} \triangleq \inf_{f_1 \in \mathcal{F}} \mathbb{E}_{x_1 \sim p_1} \inf_{f_2 \in \mathcal{F}} \mathbb{E}_{x_2 \sim p_2(\cdot|x_1)} \cdots \inf_{f_T \in \mathcal{F}} \mathbb{E}_{x_T \sim p_T(\cdot|x_{1:T-1})} \left[ \sum_{t=1}^T f_t(x_t) - \inf_{f \in \mathcal{F}} \sum_{t=1}^T f(x_t) \right]. \quad (10)$$

We will prove that for any oblivious strategy  $\mathbf{p}$ ,

$$\mathcal{V}_T(\mathcal{P}_{1:T}) \geq \mathcal{V}_T^{\mathbf{p}} = \inf_{\pi} \mathbb{E} \left[ \sum_{t=1}^T \mathbb{E}_{f_t \sim \pi_t(\cdot|x_{1:t-1})} \mathbb{E}_{x_t \sim p_t} f_t(x_t) - \inf_{f \in \mathcal{F}} \sum_{t=1}^T f(x_t) \right] \quad (11)$$

with equality holding for  $\mathbf{p}^*$  which achieves the supremum in (3). Importantly, the infimum is over strategies  $\pi = \{\pi_t\}_{t=1}^T$  of the player that *do not* depend on player's previous moves, that is  $\pi_t : \mathcal{X}^{t-1} \mapsto \mathcal{Q}$ .

Fix an oblivious strategy  $\mathbf{p}$  and note that  $\mathcal{V}_T(\mathcal{P}_{1:T}) \geq \mathcal{V}_T^{\mathbf{p}}$ . From now on, it will be understood that  $x_t$  has distribution  $p_t(\cdot|x_{1:t-1})$ . Let  $\pi = \{\pi_t\}_{t=1}^T$  be a strategy of the player, that is, a sequence of mappings  $\pi_t : (\mathcal{F} \times \mathcal{X})^{t-1} \mapsto \mathcal{Q}$ .

By moving to a functional representation in Eq. (10),

$$\mathcal{V}_T^{\mathbf{p}} = \inf_{\pi} \mathbb{E}_{f_1 \sim \pi_1} \mathbb{E}_{x_1 \sim p_1} \dots \mathbb{E}_{f_T \sim \pi_T(\cdot | f_{1:T-1}, x_{1:T-1})} \mathbb{E}_{x_T \sim p_T(\cdot | x_{1:T-1})} \left[ \sum_{t=1}^T f_t(x_t) - \inf_{f \in \mathcal{F}} \sum_{t=1}^T f(x_t) \right]$$

Note that the last term does not depend on  $f_1, \dots, f_T$ , and so the expression above is equal to

$$\begin{aligned} & \inf_{\pi} \left\{ \mathbb{E}_{f_1 \sim \pi_1} \mathbb{E}_{x_1 \sim p_1} \dots \mathbb{E}_{f_T \sim \pi_T(\cdot | f_{1:T-1}, x_{1:T-1})} \mathbb{E}_{x_T \sim p_T(\cdot | x_{1:T-1})} \left[ \sum_{t=1}^T f_t(x_t) \right] \right. \\ & \quad \left. - \mathbb{E}_{x_1 \sim p_1} \dots \mathbb{E}_{x_T \sim p_T(\cdot | x_{1:T-1})} \left[ \inf_{f \in \mathcal{F}} \sum_{t=1}^T f(x_t) \right] \right\} \\ &= \inf_{\pi} \left\{ \mathbb{E}_{f_1 \sim \pi_1} \mathbb{E}_{x_1 \sim p_1} \dots \mathbb{E}_{f_T \sim \pi_T(\cdot | f_{1:T-1}, x_{1:T-1})} \mathbb{E}_{x_T \sim p_T(\cdot | x_{1:T-1})} \left[ \sum_{t=1}^T f_t(x_t) \right] \right\} - \left\{ \mathbb{E} \left[ \inf_{f \in \mathcal{F}} \sum_{t=1}^T f(x_t) \right] \right\} \end{aligned}$$

Now, by linearity of expectation, the first term can be written as

$$\begin{aligned} & \inf_{\pi} \left\{ \sum_{t=1}^T \mathbb{E}_{f_1 \sim \pi_1} \mathbb{E}_{x_1 \sim p_1} \dots \mathbb{E}_{f_T \sim \pi_T(\cdot | f_{1:T-1}, x_{1:T-1})} \mathbb{E}_{x_T \sim p_T(\cdot | x_{1:T-1})} f_t(x_t) \right\} \\ &= \inf_{\pi} \left\{ \sum_{t=1}^T \mathbb{E}_{f_1 \sim \pi_1} \mathbb{E}_{x_1 \sim p_1} \dots \mathbb{E}_{f_t \sim \pi_t(\cdot | f_{1:t-1}, x_{1:t-1})} \mathbb{E}_{x_t \sim p_t(\cdot | x_{1:t-1})} f_t(x_t) \right\} \\ &= \inf_{\pi} \left\{ \sum_{t=1}^T \mathbb{E}_{x_1 \sim p_1} \dots \mathbb{E}_{x_t \sim p_t(\cdot | x_{1:t-1})} \left[ \mathbb{E}_{f_1 \sim \pi_1} \dots \mathbb{E}_{f_t \sim \pi_t(\cdot | f_{1:t-1}, x_{1:t-1})} f_t(x_t) \right] \right\} \quad (12) \end{aligned}$$

Now notice that for any strategy  $\pi = \{\pi_t\}_{t=1}^T$ , there is an equivalent strategy  $\pi' = \{\pi'_t\}_{t=1}^T$  that (a) gives the same value to the above expression as  $\pi$  and (b) does not depend on the past decisions of the player, that is  $\pi'_t : \mathcal{X}^{t-1} \mapsto \mathcal{Q}$ . To see why this is the case, fix any strategy  $\pi$  and for any  $t$  define

$$\pi'_t(\cdot | x_{1:t-1}) = \mathbb{E}_{f_1 \sim \pi_1} \dots \mathbb{E}_{f_{t-1} \sim \pi_{t-1}(\cdot | f_{1:t-2}, x_{1:t-2})} \pi_t(\cdot | f_{1:t-1}, x_{1:t-1})$$

where we integrated out the sequence  $f_1, \dots, f_{t-1}$ . Then

$$\mathbb{E}_{f_1 \sim \pi_1} \dots \mathbb{E}_{f_t \sim \pi_t(\cdot | f_{1:t-1}, x_{1:t-1})} f_t(x_t) = \mathbb{E}_{f_t \sim \pi'_t(\cdot | x_{1:t-1})} f_t(x_t)$$

and so  $\pi$  and  $\pi'$  give the same value in (12).

We conclude that the infimum in (12) can be restricted to those strategies  $\pi$  that do not depend on past randomizations of the player. In this case,

$$\begin{aligned} \mathcal{V}_T^{\mathbf{p}} &= \inf_{\pi} \left\{ \sum_{t=1}^T \mathbb{E}_{x_1 \sim p_1} \dots \mathbb{E}_{x_t \sim p_t(\cdot | x_{1:t-1})} \mathbb{E}_{f_t \sim \pi_t(\cdot | x_{1:t-1})} f_t(x_t) \right\} - \left\{ \mathbb{E} \left[ \inf_{f \in \mathcal{F}} \sum_{t=1}^T f(x_t) \right] \right\} \\ &= \inf_{\pi} \left\{ \sum_{t=1}^T \mathbb{E}_{x_1, \dots, x_{t-1}} \mathbb{E}_{f_t \sim \pi_t(\cdot | x_{1:t-1})} \mathbb{E}_{x_t} f_t(x_t) \right\} - \left\{ \mathbb{E} \left[ \inf_{f \in \mathcal{F}} \sum_{t=1}^T f(x_t) \right] \right\} \\ &= \inf_{\pi} \mathbb{E} \left[ \sum_{t=1}^T \mathbb{E}_{f_t \sim \pi_t(\cdot | x_{1:t-1})} \mathbb{E}_{x_t \sim p_t} f_t(x_t) - \inf_{f \in \mathcal{F}} \sum_{t=1}^T f(x_t) \right]. \end{aligned}$$

Now, notice that we can choose the Bayes optimal response  $f_t$  in each term:

$$\begin{aligned} \mathcal{V}_T^{\mathbf{p}} &= \inf_{\pi} \mathbb{E} \left[ \sum_{t=1}^T \mathbb{E}_{f_t \sim \pi_t(\cdot | x_{1:t-1})} \mathbb{E}_{x_t \sim p_t} f_t(x_t) - \inf_{f \in \mathcal{F}} \sum_{t=1}^T f(x_t) \right] \\ &\geq \inf_{\pi} \mathbb{E} \left[ \sum_{t=1}^T \inf_{f_t \in \mathcal{F}} \mathbb{E}_{x_t \sim p_t} f_t(x_t) - \inf_{f \in \mathcal{F}} \sum_{t=1}^T f(x_t) \right] \\ &= \mathbb{E} \left[ \sum_{t=1}^T \inf_{f_t \in \mathcal{F}} \mathbb{E}_{x_t \sim p_t} f_t(x_t) - \inf_{f \in \mathcal{F}} \sum_{t=1}^T f(x_t) \right]. \end{aligned}$$

Together with Theorem 1, this implies that

$$\mathcal{V}_T^{\mathbf{p}^*} = \mathcal{V}_T(\mathcal{P}_{1:T}) = \inf_{\pi} \mathbb{E} \left[ \sum_{t=1}^T \mathbb{E}_{f_t \sim \pi_t(\cdot | x_{1:t-1})} \mathbb{E}_{x_t \sim p_t^*} f_t(x_t) - \inf_{f \in \mathcal{F}} \sum_{t=1}^T f(x_t) \right]$$

for any  $\mathbf{p}^*$  achieving supremum in (3). Further, the infimum is over strategies that do not depend on the moves of the player.

We conclude that there is an oblivious minimax optimal strategy of the adversary, and there is a corresponding minimax optimal strategy for the player that does not depend on its own moves.  $\square$

**Proof of Theorem 3.** From Eq. (3),

$$\begin{aligned} \mathcal{V}_T &= \sup_{\mathbf{p} \in \mathcal{P}} \mathbb{E} \left[ \sum_{t=1}^T \inf_{f_t \in \mathcal{F}} \mathbb{E}_{t-1} [f_t(x_t)] - \inf_{f \in \mathcal{F}} \sum_{t=1}^T f(x_t) \right] \\ &= \sup_{\mathbf{p} \in \mathcal{P}} \mathbb{E} \left[ \sup_{f \in \mathcal{F}} \left\{ \sum_{t=1}^T \inf_{f_t \in \mathcal{F}} \mathbb{E}_{t-1} [f_t(x_t)] - f(x_t) \right\} \right] \\ &\leq \sup_{\mathbf{p} \in \mathcal{P}} \mathbb{E} \left[ \sup_{f \in \mathcal{F}} \left\{ \sum_{t=1}^T \mathbb{E}_{t-1} [f(x_t)] - f(x_t) \right\} \right] \end{aligned} \quad (13)$$

The upper bound is obtained by replacing each infimum by a particular choice  $f$ . Note that  $\mathbb{E}_{t-1} [f(x_t)] - f(x_t)$  is a martingale difference sequence. We now employ a symmetrization technique. For this purpose, we introduce a *tangent sequence*  $\{x'_t\}_{t=1}^T$  that is constructed as follows. Let  $x'_1$  be an independent copy of  $x_1$ . For  $t \geq 2$ , let  $x'_t$  be both identically distributed as  $x_t$  as well as independent of it conditioned on  $x_{1:t-1}$ . Then, we have, for any  $t \in [T]$  and  $f \in \mathcal{F}$ ,

$$\mathbb{E}_{t-1} [f(x_t)] = \mathbb{E}_{t-1} [f(x'_t)] = \mathbb{E}_T [f(x'_t)] . \quad (14)$$

The first equality is true by construction. The second holds because  $x'_t$  is independent of  $x_{t:T}$  conditioned on  $x_{1:t-1}$ . We also have, for any  $t \in [T]$  and  $f \in \mathcal{F}$ ,

$$f(x_t) = \mathbb{E}_T [f(x_t)] . \quad (15)$$

Plugging in (14) and (15) into (13), we get,

$$\begin{aligned} \mathcal{V}_T &\leq \sup_{\mathbf{p} \in \mathcal{P}} \mathbb{E} \left[ \sup_{f \in \mathcal{F}} \left\{ \sum_{t=1}^T \mathbb{E}_T [f(x'_t)] - \mathbb{E}_T [f(x_t)] \right\} \right] \\ &= \sup_{\mathbf{p} \in \mathcal{P}} \mathbb{E} \left[ \sup_{f \in \mathcal{F}} \left\{ \mathbb{E}_T \left[ \sum_{t=1}^T f(x'_t) - f(x_t) \right] \right\} \right] \\ &\leq \sup_{\mathbf{p} \in \mathcal{P}} \mathbb{E} \left[ \sup_{f \in \mathcal{F}} \left\{ \sum_{t=1}^T f(x'_t) - f(x_t) \right\} \right] . \end{aligned}$$

For any  $\mathbf{p}$ , the expectation in the above supremum can be written as

$$\mathbb{E} \left[ \sup_{f \in \mathcal{F}} \left\{ \sum_{t=1}^T f(x'_t) - f(x_t) \right\} \right] = \mathbb{E}_{x_1, x'_1 \sim p_1} \mathbb{E}_{x_2, x'_2 \sim p_2(\cdot | x_1)} \cdots \mathbb{E}_{x_T, x'_T \sim p_T(\cdot | x_1, \dots, x_{T-1})} \left[ \sup_{f \in \mathcal{F}} \left\{ \sum_{t=1}^T f(x'_t) - f(x_t) \right\} \right] .$$

Now, let's see what happens when we rename  $x_1$  and  $x'_1$  in the right-hand side of the above inequality. The equivalent expression we then obtain is

$$\mathbb{E}_{x'_1, x_1 \sim p_1} \mathbb{E}_{x_2, x'_2 \sim p_2(\cdot | x'_1)} \mathbb{E}_{x_3, x'_3 \sim p_3(\cdot | x'_1, x_2)} \cdots \mathbb{E}_{x_T, x'_T \sim p_T(\cdot | x'_1, x_2, \dots, x_{T-1})} \left[ \sup_{f \in \mathcal{F}} \left\{ -(f(x'_1) - f(x_1)) + \sum_{t=2}^T f(x'_t) - f(x_t) \right\} \right] .$$

Now fix any  $\epsilon \in \{\pm 1\}^T$ . Informally,  $\epsilon_t = 1$  indicates whether we rename  $x_t$  and  $x'_t$ . It is not hard to verify that

$$\begin{aligned} & \mathbb{E}_{x_1, x'_1 \sim p_1} \mathbb{E}_{x_2, x'_2 \sim p_2(\cdot | x_1)} \cdots \mathbb{E}_{x_T, x'_T \sim p_T(\cdot | x_1, \dots, x_{T-1})} \left[ \sup_{f \in \mathcal{F}} \left\{ \sum_{t=1}^T f(x'_t) - f(x_t) \right\} \right] \\ &= \mathbb{E}_{x_1, x'_1 \sim p_1} \mathbb{E}_{x_2, x'_2 \sim p_2(\cdot | \chi_1(-1))} \cdots \mathbb{E}_{x_T, x'_T \sim p_T(\cdot | \chi_1(-1), \dots, \chi_{T-1}(-1))} \left[ \sup_{f \in \mathcal{F}} \left\{ \sum_{t=1}^T f(x'_t) - f(x_t) \right\} \right] \end{aligned} \quad (16)$$

$$= \mathbb{E}_{x_1, x'_1 \sim p_1} \mathbb{E}_{x_2, x'_2 \sim p_2(\cdot | \chi_1(\epsilon_1))} \cdots \mathbb{E}_{x_T, x'_T \sim p_T(\cdot | \chi_1(\epsilon_1), \dots, \chi_{T-1}(\epsilon_{T-1}))} \left[ \sup_{f \in \mathcal{F}} \left\{ \sum_{t=1}^T -\epsilon_t (f(x'_t) - f(x_t)) \right\} \right] \quad (17)$$

Since Eq. (16) holds for any  $\epsilon \in \{\pm 1\}^T$ , we conclude that

$$\begin{aligned} & \mathbb{E} \left[ \sup_{f \in \mathcal{F}} \left\{ \sum_{t=1}^T f(x'_t) - f(x_t) \right\} \right] \quad (18) \\ &= \mathbb{E}_\epsilon \mathbb{E}_{x_1, x'_1 \sim p_1} \mathbb{E}_{x_2, x'_2 \sim p_2(\cdot | \chi_1(\epsilon_1))} \cdots \mathbb{E}_{x_T, x'_T \sim p_T(\cdot | \chi_1(\epsilon_1), \dots, \chi_{T-1}(\epsilon_{T-1}))} \left[ \sup_{f \in \mathcal{F}} \left\{ \sum_{t=1}^T -\epsilon_t (f(x'_t) - f(x_t)) \right\} \right] \\ &= \mathbb{E}_{x_1, x'_1 \sim p_1} \mathbb{E}_{\epsilon_1} \mathbb{E}_{x_2, x'_2 \sim p_2(\cdot | \chi_1(\epsilon_1))} \mathbb{E}_{\epsilon_2} \cdots \mathbb{E}_{x_T, x'_T \sim p_T(\cdot | \chi_1(\epsilon_1), \dots, \chi_{T-1}(\epsilon_{T-1}))} \mathbb{E}_{\epsilon_T} \left[ \sup_{f \in \mathcal{F}} \left\{ \sum_{t=1}^T -\epsilon_t (f(x'_t) - f(x_t)) \right\} \right]. \end{aligned}$$

The process above can be thought of as taking a path in a binary tree. At each step  $t$ , a coin is flipped and this determines whether  $x_t$  or  $x'_t$  is to be used in conditional distributions in the following steps. This is precisely the process outlined in (4). Using the definition of  $\rho$ , we can rewrite the last expression in Eq. (18) as

$$\mathbb{E}_{(x_1, x'_1) \sim \rho_1(\epsilon)} \mathbb{E}_{\epsilon_1} \mathbb{E}_{(x_2, x'_2) \sim \rho_2(\epsilon)(x_1, x'_1)} \cdots \mathbb{E}_{\epsilon_{T-1}} \mathbb{E}_{(x_T, x'_T) \sim \rho_T(\epsilon)((x_1, x'_1), \dots, (x_{T-1}, x'_{T-1}))} \mathbb{E}_{\epsilon_T} \left[ \sup_{f \in \mathcal{F}} \left\{ \sum_{t=1}^T \epsilon_t (f(x_t) - f(x'_t)) \right\} \right].$$

More succinctly, Eq. (18) can be written as

$$\mathbb{E}_{(\mathbf{x}, \mathbf{x}') \sim \rho} \left[ \sup_{f \in \mathcal{F}} \left\{ \sum_{t=1}^T f(\mathbf{x}'_t(-1)) - f(\mathbf{x}_t(-1)) \right\} \right] = \mathbb{E}_{(\mathbf{x}, \mathbf{x}') \sim \rho} \mathbb{E}_\epsilon \left[ \sup_{f \in \mathcal{F}} \left\{ \sum_{t=1}^T \epsilon_t (f(\mathbf{x}_t(\epsilon)) - f(\mathbf{x}'_t(\epsilon))) \right\} \right]. \quad (19)$$

It is worth emphasizing that the values of the mappings  $\mathbf{x}, \mathbf{x}'$  are drawn conditionally-independently, however the distribution depends on the ancestors in *both* trees. In some sense, the path  $\epsilon$  defines “who is tangent to whom”.

We now split the supremum into two:

$$\begin{aligned} & \mathbb{E}_{(\mathbf{x}, \mathbf{x}') \sim \rho} \mathbb{E}_\epsilon \left[ \sup_{f \in \mathcal{F}} \left\{ \sum_{t=1}^T \epsilon_t (f(\mathbf{x}_t(\epsilon)) - f(\mathbf{x}'_t(\epsilon))) \right\} \right] \\ & \leq \mathbb{E}_{(\mathbf{x}, \mathbf{x}') \sim \rho} \mathbb{E}_\epsilon \left[ \sup_{f \in \mathcal{F}} \sum_{t=1}^T \epsilon_t f(\mathbf{x}_t(\epsilon)) \right] + \mathbb{E}_{(\mathbf{x}, \mathbf{x}') \sim \rho} \mathbb{E}_\epsilon \left[ \sup_{f \in \mathcal{F}} \sum_{t=1}^T -\epsilon_t f(\mathbf{x}'_t(\epsilon)) \right] \quad (20) \\ & = 2 \mathbb{E}_{(\mathbf{x}, \mathbf{x}') \sim \rho} \mathbb{E}_\epsilon \left[ \sup_{f \in \mathcal{F}} \sum_{t=1}^T \epsilon_t f(\mathbf{x}_t(\epsilon)) \right] \end{aligned}$$

The last equality is not difficult to verify but requires understanding the symmetry between the paths in the  $\mathbf{x}$  and  $\mathbf{x}'$  trees. This symmetry implies that the two terms in Eq. (20) are equal. Each  $\epsilon \in$

$\{\pm 1\}^T$  in the first term defines time steps  $t$  when values in  $\mathbf{x}$  are used in conditional distributions. To any such  $\epsilon$ , there corresponds a  $-\epsilon$  in the second term which defines times when values in  $\mathbf{x}'$  are used in conditional distributions. This implies the required result. As a more concrete example, consider the path  $\epsilon = -\mathbf{1}$  in the first term. The contribution to the overall expectation is the supremum over  $f \in \mathcal{F}$  of evaluation of  $-f$  on the left-most path of the  $\mathbf{x}$  tree which is defined as successive draws from distributions  $p_t$  conditioned on the values on the left-most path, irrespective of the  $\mathbf{x}'$  tree. Now consider the corresponding path  $\epsilon = \mathbf{1}$  in the second term. Its contribution to the overall expectation is a supremum over  $f \in \mathcal{F}$  of evaluation of  $-f$  on the right-most path of the  $\mathbf{x}'$  tree, defined as successive draws from distributions  $p_t$  conditioned on the values on the right-most path, irrespective of the  $\mathbf{x}$  tree. Clearly, the contributions are the same, and the same argument can be done for any path  $\epsilon$ .

Alternatively, we can see that the two terms in Eq. (20) are equal by expanding the notation. We thus claim that

$$\begin{aligned} & \mathbb{E}_{x_1, x'_1 \sim p_1} \mathbb{E}_{\epsilon_1} \mathbb{E}_{x_2, x'_2 \sim p_2(\cdot | \chi_1(\epsilon_1))} \mathbb{E}_{\epsilon_2} \dots \mathbb{E}_{x_T, x'_T \sim p_T(\cdot | \chi_1(\epsilon_1), \dots, \chi_{T-1}(\epsilon_{T-1}))} \mathbb{E}_{\epsilon_T} \left[ \sup_{f \in \mathcal{F}} \left\{ \sum_{t=1}^T -\epsilon_t f(x'_t) \right\} \right] \\ &= \mathbb{E}_{x_1, x'_1 \sim p_1} \mathbb{E}_{\epsilon_1} \mathbb{E}_{x_2, x'_2 \sim p_2(\cdot | \chi_1(\epsilon_1))} \mathbb{E}_{\epsilon_2} \dots \mathbb{E}_{x_T, x'_T \sim p_T(\cdot | \chi_1(\epsilon_1), \dots, \chi_{T-1}(\epsilon_{T-1}))} \mathbb{E}_{\epsilon_T} \left[ \sup_{f \in \mathcal{F}} \left\{ \sum_{t=1}^T \epsilon_t f(x_t) \right\} \right] \end{aligned}$$

The identity can be verified by simultaneously renaming  $\mathbf{x}$  with  $\mathbf{x}'$  and  $\epsilon$  with  $-\epsilon$ . Since  $\chi(x, x', \epsilon) = \chi(x', x, -\epsilon)$ , the distributions in the two expressions are the same while the sum of the first term becomes the sum of the second term.

More generally, the split of Eq. (20) can be performed via an additional “centering” term. For any  $t$ , let  $M_t$  be a function with the property  $M_t(\mathbf{p}, f, \mathbf{x}, \mathbf{x}', \epsilon) = M_t(\mathbf{p}, f, \mathbf{x}', \mathbf{x}, -\epsilon)$

We then have

$$\begin{aligned} & \mathbb{E}_{(\mathbf{x}, \mathbf{x}') \sim \rho} \mathbb{E}_{\epsilon} \left[ \sup_{f \in \mathcal{F}} \left\{ \sum_{t=1}^T \epsilon_t (f(\mathbf{x}_t(\epsilon)) - f(\mathbf{x}'_t(\epsilon))) \right\} \right] \\ & \leq \mathbb{E}_{(\mathbf{x}, \mathbf{x}') \sim \rho} \mathbb{E}_{\epsilon} \left[ \sup_{f \in \mathcal{F}} \sum_{t=1}^T \epsilon_t (f(\mathbf{x}_t(\epsilon)) - M_t(\mathbf{p}, f, \mathbf{x}, \mathbf{x}', \epsilon)) \right] \\ & + \mathbb{E}_{(\mathbf{x}, \mathbf{x}') \sim \rho} \mathbb{E}_{\epsilon} \left[ \sup_{f \in \mathcal{F}} \sum_{t=1}^T -\epsilon_t (f(\mathbf{x}'_t(\epsilon)) - M_t(\mathbf{p}, f, \mathbf{x}, \mathbf{x}', \epsilon)) \right] \\ & = 2 \mathbb{E}_{(\mathbf{x}, \mathbf{x}') \sim \rho} \mathbb{E}_{\epsilon} \left[ \sup_{f \in \mathcal{F}} \sum_{t=1}^T \epsilon_t (f(\mathbf{x}_t(\epsilon)) - M_t(\mathbf{p}, f, \mathbf{x}, \mathbf{x}', \epsilon)) \right] \end{aligned} \tag{21}$$

To verify equality of the two terms in (21) we can expand the notation.

$$\begin{aligned} & \mathbb{E}_{x_1, x'_1 \sim p_1} \mathbb{E}_{\epsilon_1} \mathbb{E}_{x_2, x'_2 \sim p_2(\cdot | \chi_1(\epsilon_1))} \mathbb{E}_{\epsilon_2} \dots \mathbb{E}_{x_T, x'_T \sim p_T(\cdot | \chi_1(\epsilon_1), \dots, \chi_{T-1}(\epsilon_{T-1}))} \mathbb{E}_{\epsilon_T} \left[ \sup_{f \in \mathcal{F}} \left\{ \sum_{t=1}^T -\epsilon_t (f(x'_t) - M_t(\mathbf{p}, f, \mathbf{x}, \mathbf{x}', \epsilon)) \right\} \right] \\ &= \mathbb{E}_{x_1, x'_1 \sim p_1} \mathbb{E}_{\epsilon_1} \mathbb{E}_{x_2, x'_2 \sim p_2(\cdot | \chi_1(\epsilon_1))} \mathbb{E}_{\epsilon_2} \dots \mathbb{E}_{x_T, x'_T \sim p_T(\cdot | \chi_1(\epsilon_1), \dots, \chi_{T-1}(\epsilon_{T-1}))} \mathbb{E}_{\epsilon_T} \left[ \sup_{f \in \mathcal{F}} \left\{ \sum_{t=1}^T \epsilon_t (f(x_t) - M_t(\mathbf{p}, f, \mathbf{x}, \mathbf{x}', \epsilon)) \right\} \right] \end{aligned}$$

□

**Proof of Corollary 4.** Define a function  $M_t$  as the conditional expectation

$$M_t(\mathbf{p}, f, \mathbf{x}, \mathbf{x}', \epsilon) = \mathbb{E}_{x \sim p_t(\cdot | \chi_1(\epsilon_1), \dots, \chi_{t-1}(\epsilon_{t-1}))} f(x).$$

The property  $M_t(\mathbf{p}, f, \mathbf{x}, \mathbf{x}', \epsilon) = M_t(\mathbf{p}, f, \mathbf{x}', \mathbf{x}, -\epsilon)$  holds because  $\chi(x, x', \epsilon) = \chi(x', x, -\epsilon)$ . □

**Proof of Proposition 5.** By definition, we have,

$$\mathfrak{R}_T(\mathcal{F}, \mathbf{p}) = \mathbb{E}_{(\mathbf{x}, \mathbf{x}') \sim \rho} \mathbb{E}_\epsilon \left[ \sup_{f \in \mathcal{F}} \sum_{t=1}^T \epsilon_t f(\mathbf{x}_t(\epsilon)) \right] \quad (22)$$

In the i.i.d. case, however, the tree generation according to the  $\rho$  process simplifies: for any  $\epsilon \in \{\pm 1\}^T$ ,  $t \in [T]$ ,

$$(\mathbf{x}_t(\epsilon), \mathbf{x}'_t(\epsilon)) \sim p \times p.$$

Thus, the  $2 \cdot (2^T - 1)$  random variables  $\mathbf{x}_t(\epsilon), \mathbf{x}'_t(\epsilon)$  are all i.i.d. drawn from  $p$ . Writing the expectation (22) explicitly as an average over paths, we get

$$\begin{aligned} \mathfrak{R}_T(\mathcal{F}, \mathbf{p}) &= \frac{1}{2^T} \sum_{\epsilon \in \{\pm 1\}^T} \mathbb{E}_{(\mathbf{x}, \mathbf{x}') \sim \rho} \left[ \sup_{f \in \mathcal{F}} \sum_{t=1}^T \epsilon_t f(\mathbf{x}_t(\epsilon)) \right] \\ &= \frac{1}{2^T} \sum_{\epsilon \in \{\pm 1\}^T} \mathbb{E}_{x_1, \dots, x_T \sim p} \left[ \sup_{f \in \mathcal{F}} \sum_{t=1}^T \epsilon_t f(x_t) \right] \\ &= \mathbb{E}_\epsilon \mathbb{E}_{x_1, \dots, x_T \sim p} \left[ \sup_{f \in \mathcal{F}} \sum_{t=1}^T \epsilon_t f(x_t) \right]. \end{aligned}$$

The second equality holds because, for any fixed path  $\epsilon$ , the  $T$  random variables  $\{\mathbf{x}_t(\epsilon)\}_{t \in [T]}$  have joint distribution  $p^T$ . This proves the first claim.

We now prove the second claim. To make the  $\rho$  process associated with  $\mathbf{p}$  more explicit, we use the expanded definition:

$$\begin{aligned} \mathfrak{R}_T(\mathcal{F}, \mathbf{p}) &= \mathbb{E}_{x_1, x'_1 \sim p_1} \mathbb{E}_{\epsilon_1} \mathbb{E}_{x_2, x'_2 \sim p_2(\cdot | \chi_1(\epsilon_1))} \mathbb{E}_{\epsilon_2} \dots \mathbb{E}_{x_T, x'_T \sim p_T(\cdot | \chi_1(\epsilon_1), \dots, \chi_{T-1}(\epsilon_{T-1}))} \mathbb{E}_{\epsilon_T} \left[ \sup_{f \in \mathcal{F}} \sum_{t=1}^T \epsilon_t f(x_t) \right] \\ &\leq \sup_{x_1, x'_1} \mathbb{E}_{\epsilon_1} \sup_{x_2, x'_2} \mathbb{E}_{\epsilon_2} \dots \sup_{x_T, x'_T} \mathbb{E}_{\epsilon_T} \left[ \sup_{f \in \mathcal{F}} \sum_{t=1}^T \epsilon_t f(x_t) \right] \quad (23) \\ &= \sup_{x_1} \mathbb{E}_{\epsilon_1} \sup_{x_2} \mathbb{E}_{\epsilon_2} \dots \sup_{x_T} \mathbb{E}_{\epsilon_T} \left[ \sup_{f \in \mathcal{F}} \sum_{t=1}^T \epsilon_t f(x_t) \right] \\ &= \mathfrak{R}_T(\mathcal{F}). \end{aligned}$$

The inequality holds by replacing expectation over  $x_t, x'_t$  by a supremum over the same. We then get rid of  $x_t$ 's since they do not appear anywhere.  $\square$

**Proof of Corollary 7.** The first steps follow the proof of Theorem 3:

$$\mathcal{V}_T \leq \sup_{\mathbf{p} \in \mathfrak{P}} \mathbb{E} \left[ \sup_{f \in \mathcal{F}} \left\{ \sum_{t=1}^T f(x'_t) - f(x_t) \right\} \right]$$

and for a fixed  $\mathbf{p} \in \mathfrak{P}$ ,

$$\begin{aligned} &\mathbb{E} \left[ \sup_{f \in \mathcal{F}} \left\{ \sum_{t=1}^T f(x'_t) - f(x_t) \right\} \right] \quad (24) \\ &= \mathbb{E}_{x_1, x'_1 \sim p_1} \mathbb{E}_{\epsilon_1} \mathbb{E}_{x_2, x'_2 \sim p_2(\cdot | \chi_1(\epsilon_1))} \mathbb{E}_{\epsilon_2} \dots \mathbb{E}_{x_T, x'_T \sim p_T(\cdot | \chi_1(\epsilon_1), \dots, \chi_{T-1}(\epsilon_{T-1}))} \mathbb{E}_{\epsilon_T} \left[ \sup_{f \in \mathcal{F}} \left\{ \sum_{t=1}^T -\epsilon_t (f(x'_t) - f(x_t)) \right\} \right]. \end{aligned}$$

At this point we pass to an upper bound, unlike the proof of Theorem 3. Notice that  $p_t(\cdot | \chi_1(\epsilon_1), \dots, \chi_{t-1}(\epsilon_{t-1}))$  is a distribution with support in  $\mathcal{X}_t(\chi_1(\epsilon_1), \dots, \chi_{t-1}(\epsilon_{t-1}))$ . That is, the sequence  $\chi_1(\epsilon_1), \dots, \chi_{t-1}(\epsilon_{t-1})$  defines the constraint at time  $t$ . Passing from  $t = T$  down

to  $t = 1$ , we can replace all the expectations over  $p_t$  by the suprema over the set  $\mathcal{X}_t$ , only increasing the value:

$$\begin{aligned}
& \mathbb{E}_{x_1, x'_1 \sim p_1} \mathbb{E}_{\epsilon_1} \mathbb{E}_{x_2, x'_2 \sim p_2(\cdot | \chi_1(\epsilon_1))} \mathbb{E}_{\epsilon_2} \dots \mathbb{E}_{x_T, x'_T \sim p_T(\cdot | \chi_1(\epsilon_1), \dots, \chi_{T-1}(\epsilon_{T-1}))} \mathbb{E}_{\epsilon_T} \left[ \sup_{f \in \mathcal{F}} \left\{ \sum_{t=1}^T -\epsilon_t (f(x'_t) - f(x_t)) \right\} \right] \\
& \leq \sup_{x_1, x'_1 \in \mathcal{X}_1} \mathbb{E}_{\epsilon_1} \sup_{x_2, x'_2 \in \mathcal{X}_2(\cdot | \chi_1(\epsilon_1))} \mathbb{E}_{\epsilon_2} \dots \sup_{x_T, x'_T \in \mathcal{X}_T(\chi_1(\epsilon_1), \dots, \chi_{T-1}(\epsilon_{T-1}))} \mathbb{E}_{\epsilon_T} \left[ \sup_{f \in \mathcal{F}} \left\{ \sum_{t=1}^T -\epsilon_t (f(x'_t) - f(x_t)) \right\} \right] \\
& = \sup_{(\mathbf{x}, \mathbf{x}') \in \mathcal{T}} \mathbb{E}_{\epsilon} \left[ \sup_{f \in \mathcal{F}} \left\{ \sum_{t=1}^T -\epsilon_t (f(\mathbf{x}'_t(\epsilon)) - f(\mathbf{x}_t(\epsilon))) \right\} \right]
\end{aligned}$$

In the last equality, we passed to the tree representation. Indeed, at each step, we are choosing  $x_t, x'_t$  from the appropriate set and then flipping a coin  $\epsilon_t$  which decides which of  $x_t, x'_t$  will be used to define the constraint set through  $\chi_t(\epsilon_t)$ . This once again defines a tree structure and we may pass to the supremum over trees  $(\mathbf{x}, \mathbf{x}') \in \mathcal{T}$ . However,  $\mathcal{T}$  is not a set of all possible  $\mathcal{X}$ -valued trees: for each  $t$ ,  $\mathbf{x}_t(\epsilon), \mathbf{x}'_t(\epsilon) \in \mathcal{X}_t(\chi_1(\mathbf{x}_1, \mathbf{x}'_1, \epsilon_1), \dots, \chi_{t-1}(\mathbf{x}_{t-1}(\epsilon_{t-1}), \mathbf{x}'_{t-1}(\epsilon_{t-1}), \epsilon_{t-1}))$ . That is, the choice at each node of the tree is constrained by the values of both trees according to the path. As before, the left-most path of the  $\mathbf{x}$  tree (as well as the right-most path of the  $\mathbf{x}'$  tree) is defined by constraints applied to the values on the path only disregarding the other tree.

The rest of the proof exactly follows the proof of Theorem 3.  $\square$

**Proof of Proposition 8.** Let  $M_t(f, \mathbf{x}, \mathbf{x}', \epsilon) = \frac{1}{t-1} \sum_{\tau=1}^{t-1} f(\chi_\tau(\epsilon_\tau))$ . Note that since  $\chi(x, x', \epsilon) = \chi(x', x, -\epsilon)$ , we have that  $M_t(f, \mathbf{x}, \mathbf{x}', \epsilon) = M_t(f, \mathbf{x}', \mathbf{x}, -\epsilon)$ . Using 7 we conclude that

$$\begin{aligned}
\mathcal{V}_T & \leq 2 \sup_{(\mathbf{x}, \mathbf{x}') \in \mathcal{T}} \mathbb{E}_{\epsilon} \left[ \sup_{f \in \mathcal{F}} \sum_{t=1}^T \epsilon_t \left( \langle f, \mathbf{x}_t(\epsilon) \rangle - \frac{1}{t-1} \sum_{\tau=1}^{t-1} \langle f, \chi_\tau(\epsilon_\tau) \rangle \right) \right] \\
& = 2 \sup_{(\mathbf{x}, \mathbf{x}') \in \mathcal{T}} \mathbb{E}_{\epsilon} \left[ \sup_{f \in \mathcal{F}} \left\langle f, \sum_{t=1}^T \epsilon_t \left( \mathbf{x}_t(\epsilon) - \frac{1}{t-1} \sum_{\tau=1}^{t-1} \chi_\tau(\epsilon_\tau) \right) \right\rangle \right]
\end{aligned}$$

By linearity and Fenchel's inequality, the last expression is upper bounded by

$$\begin{aligned}
& \frac{2}{\alpha} \sup_{(\mathbf{x}, \mathbf{x}') \in \mathcal{T}} \mathbb{E}_{\epsilon} \left[ \sup_{f \in \mathcal{F}} \left\langle f, \alpha \sum_{t=1}^T \epsilon_t \left( \mathbf{x}_t(\epsilon) - \frac{1}{t-1} \sum_{\tau=1}^{t-1} \chi_\tau(\epsilon_\tau) \right) \right\rangle \right] \\
& \leq \frac{2}{\alpha} \sup_{(\mathbf{x}, \mathbf{x}') \in \mathcal{T}} \mathbb{E}_{\epsilon} \left[ \sup_{f \in \mathcal{F}} \Psi(f) + \Psi^* \left( \alpha \sum_{t=1}^T \epsilon_t \left( \mathbf{x}_t(\epsilon) - \frac{1}{t-1} \sum_{\tau=1}^{t-1} \chi_\tau(\epsilon_\tau) \right) \right) \right] \\
& \leq \frac{2}{\alpha} \left( \sup_{f \in \mathcal{F}} \Psi(f) + \sup_{(\mathbf{x}, \mathbf{x}') \in \mathcal{T}} \mathbb{E}_{\epsilon} \left[ \Psi^* \left( \alpha \sum_{t=1}^T \epsilon_t \left( \mathbf{x}_t(\epsilon) - \frac{1}{t-1} \sum_{\tau=1}^{t-1} \chi_\tau(\epsilon_\tau) \right) \right) \right] \right) \\
& \leq \frac{2R^2}{\alpha} + \frac{2}{\alpha} \sup_{(\mathbf{x}, \mathbf{x}') \in \mathcal{T}} \mathbb{E}_{\epsilon} \left[ \Psi^* \left( \alpha \sum_{t=1}^T \epsilon_t \left( \mathbf{x}_t(\epsilon) - \frac{1}{t-1} \sum_{\tau=1}^{t-1} \chi_\tau(\epsilon_\tau) \right) \right) \right] \\
& \leq \frac{2R^2}{\alpha} + \frac{\alpha}{\lambda} \sum_{t=1}^T \mathbb{E}_{\epsilon} \left[ \left\| \mathbf{x}_t(\epsilon) - \frac{1}{t-1} \sum_{\tau=1}^{t-1} \chi_\tau(\epsilon_\tau) \right\|_*^2 \right] \tag{25}
\end{aligned}$$

Where the last step follows from Lemma 2 of [5] (with a slight modification). However since  $(\mathbf{x}, \mathbf{x}') \in \mathcal{T}$  are pairs of tree such that for any  $\epsilon \in \{\pm 1\}^T$  and any  $t \in [T]$ ,

$$C(\chi_1(\epsilon_1), \dots, \chi_{t-1}(\epsilon_{t-1}), \mathbf{x}_t(\epsilon)) = 1$$

we can conclude that for any  $\epsilon \in \{\pm 1\}^T$  and any  $t \in [T]$ ,

$$\left\| \mathbf{x}_t(\epsilon) - \frac{1}{t-1} \sum_{\tau=1}^{t-1} \chi_\tau(\epsilon_\tau) \right\|_* \leq \sigma_t$$

Using this with Equation 25 and the fact that  $\alpha$  is arbitrary, we can conclude that

$$\mathcal{V}_T \leq \inf_{\alpha > 0} \left\{ \frac{2R^2}{\alpha} + \frac{\alpha}{\lambda} \sum_{t=1}^T \sigma_t^2 \right\} \leq 2\sqrt{2}R \sqrt{\sum_{t=1}^T \sigma_t^2}$$

□

**Proof of Proposition 9.** Let  $M_t(f, \mathbf{x}, \mathbf{x}', \epsilon) = f(\chi_{t-1}(\epsilon_{t-1}))$ . Note that since  $\chi(x, x', \epsilon) = \chi(x', x, -\epsilon)$  we have that  $M_t(f, \mathbf{x}, \mathbf{x}', \epsilon) = M_t(f, \mathbf{x}', \mathbf{x}, -\epsilon)$ . Using 7 we conclude that

$$\begin{aligned} \mathcal{V}_T &\leq 2 \sup_{(\mathbf{x}, \mathbf{x}') \in \mathcal{T}} \mathbb{E}_\epsilon \left[ \sup_{f \in \mathcal{F}} \sum_{t=1}^T \epsilon_t (\langle f, \mathbf{x}_t(\epsilon) \rangle - \langle f, \chi_{t-1}(\epsilon_{t-1}) \rangle) \right] \\ &= 2 \sup_{(\mathbf{x}, \mathbf{x}') \in \mathcal{T}} \mathbb{E}_\epsilon \left[ \sup_{f \in \mathcal{F}} \left\langle f, \sum_{t=1}^T \epsilon_t (\mathbf{x}_t(\epsilon) - \chi_{t-1}(\epsilon_{t-1})) \right\rangle \right] \end{aligned}$$

As before, using linearity and Fenchel's inequality we pass to the upper bound

$$\begin{aligned} &\frac{2}{\alpha} \sup_{(\mathbf{x}, \mathbf{x}') \in \mathcal{T}} \mathbb{E}_\epsilon \left[ \sup_{f \in \mathcal{F}} \left\langle f, \alpha \sum_{t=1}^T \epsilon_t (\mathbf{x}_t(\epsilon) - \chi_{t-1}(\epsilon_{t-1})) \right\rangle \right] \\ &\leq \frac{2}{\alpha} \sup_{(\mathbf{x}, \mathbf{x}') \in \mathcal{T}} \mathbb{E}_\epsilon \left[ \sup_{f \in \mathcal{F}} \Psi(f) + \Psi^* \left( \alpha \sum_{t=1}^T \epsilon_t (\mathbf{x}_t(\epsilon) - \chi_{t-1}(\epsilon_{t-1})) \right) \right] \\ &\leq \frac{2}{\alpha} \left( \sup_{f \in \mathcal{F}} \Psi(f) + \sup_{(\mathbf{x}, \mathbf{x}') \in \mathcal{T}} \mathbb{E}_\epsilon \left[ \Psi^* \left( \alpha \sum_{t=1}^T \epsilon_t (\mathbf{x}_t(\epsilon) - \chi_{t-1}(\epsilon_{t-1})) \right) \right] \right) \\ &\leq \frac{2R^2}{\alpha} + \frac{2}{\alpha} \sup_{(\mathbf{x}, \mathbf{x}') \in \mathcal{T}} \mathbb{E}_\epsilon \left[ \Psi^* \left( \alpha \sum_{t=1}^T \epsilon_t (\mathbf{x}_t(\epsilon) - \chi_{t-1}(\epsilon_{t-1})) \right) \right] \\ &\leq \frac{2R^2}{\alpha} + \frac{\alpha}{\lambda} \sum_{t=1}^T \mathbb{E}_\epsilon \left[ \|\mathbf{x}_t(\epsilon) - \chi_{t-1}(\epsilon_{t-1})\|_*^2 \right] \end{aligned} \tag{26}$$

Where the last step follows from Lemma 2 of [5] (with slight modification). However since  $(\mathbf{x}, \mathbf{x}') \in \mathcal{T}$  are pairs of tree such that for any  $\epsilon \in \{\pm 1\}^T$  and any  $t \in [T]$ ,

$$C(\chi_1(\epsilon_1), \dots, \chi_{t-1}(\epsilon_{t-1}), \mathbf{x}_t(\epsilon)) = 1$$

we can conclude that for any  $\epsilon \in \{\pm 1\}^T$  and any  $t \in [T]$ ,

$$\|\mathbf{x}_t(\epsilon) - \chi_{t-1}(\epsilon_{t-1})\|_* \leq \delta$$

Using this with Equation 26 and the fact that  $\alpha$  is arbitrary, we can conclude that

$$\mathcal{V}_T \leq \inf_{\alpha > 0} \left\{ \frac{2R^2}{\alpha} + \frac{\alpha \delta^2 T}{\lambda} \right\} \leq 2R\delta\sqrt{2T}$$

□

**Proof of Theorem 10.** First, using the fact that the maximum of a linear functional over a simplex is achieved at the corners,

$$\begin{aligned} \mathcal{V}_T &= \inf_{q_1} \sup_{x_1} \mathbb{E}_{f_1 \sim q_1, s_1 \sim \sigma} \dots \inf_{q_T} \sup_{x_T} \mathbb{E}_{f_T \sim q_T, s_T \sim \sigma} \left[ \sum_{t=1}^T f_t(\omega(x_t, s_t)) - \inf_{f \in \mathcal{F}} \sum_{t=1}^T f(\omega(x_t, s_t)) \right] \\ &= \inf_{q_1} \sup_{p_1} \mathbb{E}_{f_1 \sim q_1, x_1 \sim p_1, s_1 \sim \sigma} \dots \inf_{q_T} \sup_{p_T} \mathbb{E}_{f_T \sim q_T, x_T \sim p_T, s_T \sim \sigma} \left[ \sum_{t=1}^T f_t(\omega(x_t, s_t)) - \inf_{f \in \mathcal{F}} \sum_{t=1}^T f(\omega(x_t, s_t)) \right]. \end{aligned}$$



Next, appealing to the minimax theorem, the last quantity is equal to

$$\sup_{p_1} \inf_{f_1} \mathbb{E}_{x_1 \sim p_1} \dots \sup_{p_T} \inf_{f_T} \mathbb{E}_{x_T \sim p_T} \left[ \sum_{t=1}^T f_t(\omega(x_t, s_t)) - \inf_{f \in \mathcal{F}} \sum_{t=1}^T f(\omega(x_t, s_t)) \right]$$

Using the technique of [1, 10], we can rewrite the last quantity as

$$= \sup_{p_1} \mathbb{E}_{x_1 \sim p_1} \dots \sup_{p_T} \mathbb{E}_{x_T \sim p_T} \left[ \sum_{t=1}^T \inf_{f_t} \mathbb{E}_{x'_t, s'_t} f_t(\omega(x'_t, s'_t)) - \inf_{f \in \mathcal{F}} \sum_{t=1}^T f(\omega(x_t, s_t)) \right]$$

where  $x'_t$  has the same distribution as  $x_t$  conditioned on the history up to time  $t$ . Further, the  $s'_t$  sequence is i.i.d. with distribution  $\sigma$ . Rewriting the above, we arrive at

$$\begin{aligned} & \sup_{p_1} \mathbb{E}_{x_1 \sim p_1} \dots \sup_{p_T} \mathbb{E}_{x_T \sim p_T} \left[ \sup_{f \in \mathcal{F}} \left\{ \sum_{t=1}^T \inf_{f_t} \mathbb{E}_{x'_t, s'_t} f_t(\omega(x'_t, s'_t)) - \sum_{t=1}^T f(\omega(x_t, s_t)) \right\} \right] \\ & \leq \sup_{p_1} \mathbb{E}_{x_1 \sim p_1} \dots \sup_{p_T} \mathbb{E}_{x_T \sim p_T} \left[ \sup_{f \in \mathcal{F}} \left\{ \sum_{t=1}^T \mathbb{E}_{x'_t, s'_t} f(\omega(x'_t, s'_t)) - \sum_{t=1}^T f(\omega(x_t, s_t)) \right\} \right] \\ & \leq \sup_{p_1} \mathbb{E}_{x_1, x'_1 \sim p_1} \dots \sup_{p_T} \mathbb{E}_{x_T, x'_T \sim p_T} \left[ \sup_{f \in \mathcal{F}} \left\{ \sum_{t=1}^T f(\omega(x'_t, s'_t)) - \sum_{t=1}^T f(\omega(x_t, s_t)) \right\} \right] \end{aligned}$$

where we've substituted  $f_t$  with a suboptimal choice  $f$ , and then used Jensen's inequality. The expectation over  $x_t, x'_t$  can be upper bounded by the suprema, yielding

$$\begin{aligned} & \sup_{x_1, x'_1} \mathbb{E}_{s_1, s'_1 \sim \sigma} \mathbb{E}_{\epsilon_1} \dots \sup_{x_T, x'_T} \mathbb{E}_{s_T, s'_T \sim \sigma} \mathbb{E}_{\epsilon_T} \left[ \sup_{f \in \mathcal{F}} \left\{ \sum_{t=1}^T \epsilon_t (f(\omega(x'_t, s'_t)) - f(\omega(x_t, s_t))) \right\} \right] \\ & \leq 2 \sup_{x_1} \mathbb{E}_{s_1 \sim \sigma} \mathbb{E}_{\epsilon_1} \dots \sup_{x_T} \mathbb{E}_{s_T \sim \sigma} \mathbb{E}_{\epsilon_T} \left[ \sup_{f \in \mathcal{F}} \sum_{t=1}^T \epsilon_t f(\omega(x_t, s_t)) \right] \end{aligned}$$

□

**Proof of Lemma 11.** Let us calculate the probability that for no distinct  $t, t' \in [T]$  do we have  $z_t + s_t$  and  $z_{t'} + s_{t'}$  in the same “bin”  $[\theta_i, \theta_{i+1})$ . We can deal with the boundary behavior by ensuring that  $\mathcal{F}$  is in fact a set of thresholds that is  $\gamma/2$ -away from 0 or 1, but we will omit this discussion for the sake of clarity. The probability that no two elements  $z_t + s_t$  and  $z_{t'} + s_{t'}$  fall into the same bin clearly depends on the behavior of the adversary in choosing  $x_t$ 's. Keeping in mind that the distribution of all  $s_t$ 's is uniform on  $[-\gamma/2, \gamma/2]$ , we see that the probability of a collision is maximized when  $z_t$  is chosen to be constant throughout the  $T$  rounds. To see this, let us recast the problem as throwing balls into bins. Observe that the choice of  $z_t$  defines the set of  $\gamma T^a$  bins into which the ball  $z_t + s_t$  falls. To maximize the probability of a “collision”, the set of bins should be kept the same for all  $T$  rounds.

Now, for  $z_t$ 's constant throughout the game, we have reduced the problem to that of  $T$  balls falling uniformly into  $\gamma T^a > T$  bins. The probability of two elements  $z_t + s_t$  and  $z_{t'} + s_{t'}$  falling into the same bin is

$$\begin{aligned} P(\text{no two balls fall into same bin}) &= \frac{\gamma T^a (\gamma T^a - 1) \dots (\gamma T^a - T)}{\gamma T^a \cdot \gamma T^a \dots \gamma T^a} \\ &\geq \left( \frac{\gamma T^a - T}{\gamma T^a} \right)^T = \left( 1 - \frac{1}{\gamma T^{a-1}} \right)^{\frac{\gamma T^{a-1}}{\gamma T^{a-2}}} \end{aligned}$$

The last term is approximately  $\exp \{-1/(\gamma T^{a-2})\}$  for large  $T$ , so

$$P(\text{no two balls fall into same bin}) \geq 1 - \frac{1}{\gamma T^{a-2}}$$

using  $e^{-x} \geq 1 - x$ .

□

**Proof of Proposition 12.** The idea for the proof is the following. By discretizing the interval into bins of size well below the noise level, we can guarantee with high probability that no two smoothed choices  $z_t + s_t$  of the adversary fall into the same bin. If this is the case, then the supremum of Theorem 10 can be taken over a discretized set of thresholds. Now, for each fixed threshold  $f$ ,  $\epsilon_t f(\omega(x_t, s_t))$  forms a martingale difference sequence, yielding the desired bound.

For any  $f_\theta \in \mathcal{F}$ , define

$$M_t^\theta = \epsilon_t f_\theta(\omega(x_t, s_t)) = \epsilon_t |y_t - \mathbf{1}\{z_t + s_t < \theta\}|.$$

Note that  $\{M_t^\theta\}_t$  is a zero-mean martingale difference sequence, that is  $\mathbb{E}[M_t | z_{1:t}, y_{1:t}, s_{1:t}] = 0$ . We conclude that for any fixed  $\theta \in [0, 1]$ ,

$$P\left(\sum_{t=1}^T M_t^\theta \geq \epsilon\right) \leq \exp\left\{-\frac{\epsilon^2}{2T}\right\}$$

by Azuma-Hoeffding's inequality. Let  $\mathcal{F}' = \{f_{\theta_1}, \dots, f_{\theta_N}\} \subset \mathcal{F}$  be obtained by discretizing the interval  $[0, 1]$  into  $N = T^a$  bins  $[\theta_i, \theta_{i+1})$  of length  $T^{-a}$ , for some  $a \geq 3$ . Then

$$P\left(\max_{f_\theta \in \mathcal{F}'} \sum_{t=1}^T M_t^\theta \geq \epsilon\right) \leq N \exp\left\{-\frac{\epsilon^2}{2T}\right\}.$$

Observe that the maximum over the discretization coincides with the supremum over the class  $\mathcal{F}$  if no two elements  $z_t + s_t$  and  $z_{t'} + s_{t'}$  fall into the same interval  $[\theta_i, \theta_{i+1})$ . Indeed, in this case all the possible values of  $\mathcal{F}$  on the set  $\{z_1 + s_1, \dots, z_T + s_T\}$  are obtained by choosing the discrete thresholds in  $\mathcal{F}'$ .

By Lemma 11,

$$\begin{aligned} & P\left(\sup_{f \in \mathcal{F}} \sum_{t=1}^T \epsilon_t f(\omega(x_t, s_t)) \geq \epsilon\right) \\ & \leq P\left(\sup_{f \in \mathcal{F}} \sum_{t=1}^T \epsilon_t f(\omega(x_t, s_t)) \geq \epsilon \wedge \text{none of } (z_t + s_t)\text{'s fall into same bin}\right) \\ & \quad + P(\text{some of } (z_t + s_t)\text{'s fall into same bin}) \\ & = P\left(\max_{f_\theta \in \mathcal{F}'} \sum_{t=1}^T M_t^\theta \geq \epsilon \wedge \text{none of } (z_t + s_t)\text{'s fall into same bin}\right) + \frac{1}{\gamma T^{a-2}} \\ & \leq P\left(\max_{f_\theta \in \mathcal{F}'} \sum_{t=1}^T M_t^\theta \geq \epsilon\right) + \frac{1}{\gamma T^{a-2}} \\ & \leq T^a \exp\left\{-\frac{\epsilon^2}{2T}\right\} + \frac{1}{\gamma T^{a-2}}. \end{aligned}$$

Using the above and the fact that for any  $f \in \mathcal{F}$ ,  $|\sum_{t=1}^T \epsilon_t f(\omega(x_t, s_t))| \leq T$  we can conclude that

$$\begin{aligned} \mathcal{V}_T & \leq \mathbb{E}\left[\sup_{f \in \mathcal{F}} \sum_{t=1}^T \epsilon_t f(\omega(x_t, s_t))\right] \\ & \leq \epsilon + T^{a+1} \exp\left\{-\frac{\epsilon^2}{2T}\right\} + \frac{T^{3-a}}{\gamma}. \end{aligned}$$

Setting  $\epsilon = \sqrt{2(a+1)T \log T}$  we conclude that

$$\mathcal{V}_T \leq 1 + \sqrt{2(a+1)T \log T} + \frac{T^{3-a}}{\gamma}.$$

Pick  $a = 3 + \frac{\log(1/\gamma)}{\log T}$  (this choice is fine because  $\gamma T^{a-1} = T^2$  which grows with  $T$  as needed for the previous approximation). Hence we see that

$$\begin{aligned}\mathcal{V}_T &\leq 2 + \sqrt{2 \left( 4 + \frac{\log(1/\gamma)}{\log T} \right) T \log T} \\ &= 2 + \sqrt{2T(4 \log T + \log(1/\gamma))}.\end{aligned}$$

□

**Proof of Proposition 13.** As in the one dimensional case, we divide the surface of the sphere into bins (e.g. via tessellation of the sphere), with diameter  $T^{-a}$ , for some  $a > 1$ . Then the volume of each bin is at most  $O(T^{-(d-1)a})$ . Once again, the choice of  $z_t$  is deciding on the set of  $\Omega(\gamma^{d-1}T^{(d-1)a})$  bins. The probability of two perturbed values in the sequence falling into the same bin is maximized when  $z_t$  is kept constant. In this case, with the same calculation as for the one-dimensional case, the probability of a collision is at most  $O(\gamma^{1-d}T^{2-(d-1)a})$ .

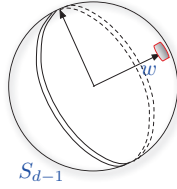

Figure 1: As  $w$  varies over the small bin, only a small number of bins change the side of the hyperplane  $\langle w, z \rangle$

It remains to show that for any  $w \in S_{d-1}$ , we can pass to the center of the associated bin at the cost of a small number of bins changing the side of the hyperplane. It is not hard to see that all such bins form a narrow “ring”. The number of bins is thus  $O(v_{d-2} \cdot T^a)$ , where  $v_{d-2}$  is the volume of a  $d - 2$ -dimensional “ring” on the sphere  $S_{d-1}$ .

The final result is obtained by choosing  $a = \frac{\log 1/\gamma}{\log T} + \frac{3}{d-1}$ , similarly to the proof of Proposition 12. □

## B Application: The I.I.D. Adversary

In this section, we consider an adversary who is restricted to draw the moves from a fixed distribution  $p$  throughout the game. That is, the time-invariant restrictions are  $\mathcal{P}_t(x_{1:t-1}) = \{p\}$ . A reader will notice that the definition of the value in (1) forces the restrictions  $\mathcal{P}_{1:T}$  to be known to the player before the game. This, in turn, means that the distribution  $p$  is known to the learner. In some sense, the problem becomes not interesting, as there is no learning to be done. This is indeed an artifact of the minimax formulation in the *extensive form*. To circumvent the problem, we are forced to define a new value of the game in terms of *strategies*. Such a formulation does allow us to “hide” the distribution from the player since we can talk about “mappings” instead of making the information explicit. We then show two novel results. First, the regret-minimization game with i.i.d. data when the player does *not* observe the distribution  $p$  is equivalent (in terms of learnability) to the classical batch learning problem. Second, for supervised learning, when it comes to minimizing regret, the knowledge of  $p$  does not help the learner for some distributions.

Let us first define some relevant quantities. Let  $\mathbf{s} = \{s_t\}_{t=1}^T$  be a  $T$ -round strategy for the player, with  $s_t : (\mathcal{F} \times \mathcal{X})^{t-1} \rightarrow \mathcal{Q}$ . The game where the player does not observe the i.i.d. distribution of the adversary will be called a *distribution-blind* i.i.d. game, and its minimax value will be called the *distribution-blind minimax value*:

$$\mathcal{V}_T^{\text{blind}} \triangleq \inf_{\mathbf{s}} \sup_p \left[ \mathbb{E}_{x_1, \dots, x_T \sim p} \mathbb{E}_{f_1 \sim s_1} \dots \mathbb{E}_{f_T \sim s_T(x_{1:T-1}, f_{1:T-1})} \left\{ \sum_{t=1}^T f_t(x_t) - \inf_{f \in \mathcal{F}} \sum_{t=1}^T f(x_t) \right\} \right]$$

Furthermore, define the value for a general (not necessarily supervised) setting:

$$\mathcal{V}_T^{\text{batch}} \triangleq \inf_{\hat{f}_T} \sup_{p \in \mathcal{P}} \left\{ \mathbb{E} \hat{f}_T - \inf_{f \in \mathcal{F}} \mathbb{E} f \right\}$$

For a distribution  $p$ , the value (1) of the online i.i.d. game, as defined through the restrictions  $\mathcal{P}_t = \{p\}$  for all  $t$ , will be written as  $\mathcal{V}_T(\{p\})$ . For the non-blind game, we say that the problem is online learnable in the i.i.d. setting if  $\sup_p \mathcal{V}_T(\{p\}) \rightarrow 0$ .

We now proceed to study relationships between online and batch learnability.

**Theorem 14.** *For a given function class  $\mathcal{F}$ , online learnability in the distribution-blind game is equivalent to batch learnability. That is,  $\mathcal{V}_T^{\text{blind}}/T \rightarrow 0$  if and only if  $\mathcal{V}_T^{\text{batch}} \rightarrow 0$ .*

At this point, the reader might wonder if the game formulation studied in the rest of the paper, with the restrictions known to the player, is any easier than batch and distribution-blind learning. In the next section, we show that this is not the case for supervised learning.

### B.1 Distribution-Blind vs Non-Blind Supervised Learning

In the supervised game, at time  $t$ , the player picks a function  $f_t \in [-1, 1]^{\mathcal{X}}$ , the adversary provides input-target pair  $(x_t, y_t)$ , and the player suffers loss  $|f_t(x_t) - y_t|$ . The value of the online supervised learning game for general restrictions  $\mathcal{P}_{1:T}$  is defined as

$$\mathcal{V}_T^{\text{sup}}(\mathcal{P}_{1:T}) \triangleq \inf_{q_1 \in \mathcal{Q}} \sup_{p_1 \in \mathcal{P}_1} \mathbb{E}_{f_1, (x_1, y_1)} \cdots \inf_{q_T \in \mathcal{Q}} \sup_{p_T \in \mathcal{P}_T} \mathbb{E}_{f_T, (x_T, y_T)} \left[ \sum_{t=1}^T |f_t(x_t) - y_t| - \inf_{f \in \mathcal{F}} \sum_{t=1}^T |f(x_t) - y_t| \right]$$

where  $(x_t, y_t)$  has distribution  $p_t$ . As before, the value of an i.i.d. supervised game with a distribution  $p_{X \times Y}$  will be written as  $\mathcal{V}_T^{\text{sup}}(p_{X \times Y})$ . The distribution-blind supervised value is defined as

$$\mathcal{V}_T^{\text{blind, sup}} \triangleq \inf_{\mathbf{s}} \sup_p \left[ \mathbb{E}_{z_{1:T} \sim p} \mathbb{E}_{f_1 \sim s_1} \cdots \mathbb{E}_{f_T \sim s_T} \left( \sum_{t=1}^T |f_t(x_t) - y_t| - \inf_{f \in \mathcal{F}} \sum_{t=1}^T |f(x_t) - y_t| \right) \right]$$

where we use the shorthand  $z_t = (x_t, y_t)$  for each  $t$ , and the batch supervised value for the absolute loss is defined as

$$\mathcal{V}_T^{\text{batch, sup}} = \inf_{\hat{f}} \sup_{p_{X \times Y}} \left\{ \mathbb{E} |Y - \hat{f}(X)| - \inf_{f \in \mathcal{F}} \mathbb{E} |Y - f(X)| \right\} \quad (27)$$

The following relationships hold:

**Lemma 15.** *In the supervised case,*

$$\frac{1}{4} T \mathcal{V}_T^{\text{batch, sup}} \leq \sup_{p_X} \mathfrak{R}_T(\mathcal{F}, p_X) \leq \sup_{p_X} \mathcal{V}_T^{\text{sup}}(\{p_X \times U_Y\}) \leq \sup_{p_{X \times Y}} \mathcal{V}_T^{\text{sup}}(\{p_{X \times Y}\}) \leq \mathcal{V}_T^{\text{blind, sup}}$$

where  $\mathfrak{R}_T(\mathcal{F}, p_X)$  is the classical Rademacher complexity, and  $U_Y$  is the Rademacher distribution.

Theorem 14, specialized to the supervised setting, says that  $\frac{1}{T} \mathcal{V}_T^{\text{blind, sup}} \rightarrow 0$  if and only if  $\mathcal{V}_T^{\text{batch, sup}} \rightarrow 0$ . Since  $\sup_{p_{X \times Y}} \frac{1}{T} \mathcal{V}_T^{\text{sup}}(\{p_{X \times Y}\})$  is sandwiched between these two values, we conclude the following.

**Corollary 16.** *Either the supervised problem is learnable in the batch sense (and, by Theorem 14, in the distribution-blind online sense), in which case  $\sup_{p_{X \times Y}} \mathcal{V}_T^{\text{sup}}(\{p_{X \times Y}\}) = o(T)$ . Or, the problem is not learnable in the batch (and the distribution-blind sense), in which case it is not learnable for all distributions in the online sense:  $\sup_{p_{X \times Y}} \mathcal{V}_T^{\text{sup}}(\{p_{X \times Y}\})$  does not grow sublinearly.*

### B.2 Proofs

**Proof of Theorem 14.** With a proof along the lines of Proposition 2 we establish that

$$\begin{aligned} \frac{1}{T} \mathcal{V}_T^{\text{blind}} &= \inf_{\mathbf{s}} \sup_p \left\{ \frac{1}{T} \sum_{t=1}^T \mathbb{E}_{x_1, \dots, x_t \sim p} \mathbb{E}_{f_t \sim s_t(x_{1:t-1}, f_{1:t-1})} [f_t(x_t)] - \mathbb{E}_{x_1, \dots, x_T \sim p} \left[ \inf_{f \in \mathcal{F}} \frac{1}{T} \sum_{t=1}^T f(x_t) \right] \right\} \\ &\geq \inf_{\mathbf{s}} \sup_p \left\{ \mathbb{E}_{x_1, \dots, x_T \sim p} \left[ \frac{1}{T} \sum_{t=1}^T \mathbb{E}_{f_t \sim s_t(x_1, \dots, x_{t-1})} [\mathbb{E}_{x \sim p} [f_t(x)]] \right] - \inf_{f \in \mathcal{F}} \mathbb{E}_{x_1, \dots, x_T \sim p} \left[ \frac{1}{T} \sum_{t=1}^T f(x_t) \right] \right\} \end{aligned}$$

where in the second line we passed to strategies that do not depend on their own randomizations. The argument for this can be found in the proof of Proposition 2. The last expression can be conveniently written as

$$\frac{1}{T} \mathcal{V}_T^{\text{blind}} \geq \inf_{\mathbf{s}} \sup_p \left\{ \mathbb{E}_{x_1, \dots, x_T \sim p} \left[ \mathbb{E}_{r \sim \text{Unif}[T-1]} \mathbb{E}_{f \sim s_{r+1}(x_1, \dots, x_r)} [\mathbb{E}_{x \sim p} [f(x)]] - \inf_{f \in \mathcal{F}} \mathbb{E}_{x \sim p} [f(x)] \right] \right\}$$

The above implies that if  $\mathcal{V}_T^{\text{blind}} = o(T)$  (i.e. the problem is learnable against an i.i.d adversary in the online sense without knowing the distribution  $p$ ), then the problem is learnable in the classical batch sense. Specifically, there exists a strategy  $\mathbf{s} = \{s_t\}_{t=1}^T$  with  $s_t : \mathcal{X}^{t-1} \mapsto \mathcal{Q}$  such that

$$\sup_p \left\{ \mathbb{E}_{x_1, \dots, x_T \sim p} [\mathbb{E}_{r \sim \text{Unif}[1 \dots T]} \mathbb{E}_{f \sim s_{r+1}(x_1, \dots, x_r)} [\mathbb{E}_{x \sim p} [f(x)]]] - \inf_{f \in \mathcal{F}} \mathbb{E}_{x \sim p} [f(x)] \right\} = o(1).$$

This strategy can be used to define a consistent (randomized) algorithm  $\hat{f}_T : \mathcal{X}^T \mapsto \mathcal{F}$  as follows. Given an i.i.d. sample  $x_1, \dots, x_T$ , draw a random index  $r$  from  $1, \dots, T$ , and define  $\hat{f}_T$  as a random draw from distribution  $s_r(x_1, \dots, x_{r-1})$ . We have proven that  $\mathcal{V}_T^{\text{batch}} \rightarrow 0$  as  $T$  increases, which the requirement of Eq. (27) in the general non-supervised case. Note that the rate of this convergence is upper bounded by the rate of decay of  $\frac{1}{T} \mathcal{V}_T^{\text{blind}}$  to zero.

To show the reverse direction, say a problem is learnable in the classical batch sense. That is,  $\mathcal{V}_T^{\text{batch}} \rightarrow 0$ . Hence, there exists a randomized strategy  $\mathbf{s} = (s_1, s_2, \dots)$  such that  $s_t : \mathcal{X}^{t-1} \mapsto \mathcal{Q}$  and

$$\sup_p \left\{ \mathbb{E}_{x_1, \dots, x_{t-1} \sim p} [\mathbb{E}_{f \sim s_t(x_1, \dots, x_{t-1})} \mathbb{E}_{x \sim p} [f(x)]] - \inf_{f \in \mathcal{F}} \mathbb{E}_{x \sim p} [f(x)] \right\} = o(1)$$

as  $t \rightarrow \infty$ . Hence we have that

$$\begin{aligned} & \sup_p \left\{ \mathbb{E}_{x_1, \dots, x_T \sim p} \left[ \frac{1}{T} \sum_{t=1}^T \mathbb{E}_{f \sim s_t(x_1, \dots, x_{t-1})} \mathbb{E}_{x \sim p} [f(x)] - \inf_{f \in \mathcal{F}} \mathbb{E}_{x \sim p} [f(x)] \right] \right\} \\ & \leq \frac{1}{T} \sum_{t=1}^T \sup_p \left\{ \mathbb{E}_{x_1, \dots, x_T \sim p} \left[ \mathbb{E}_{f \sim s_t(x_1, \dots, x_{t-1})} \mathbb{E}_{x \sim p} [f(x)] - \inf_{f \in \mathcal{F}} \mathbb{E}_{x \sim p} [f(x)] \right] \right\} = o(1) \end{aligned}$$

because a Cesàro average of a convergent sequence also converges to the same limit.

As shown in [12], the problem is learnable in the batch sense if and only if

$$\mathbb{E}_{x_1, \dots, x_T \sim p} \left[ \inf_{f \in \mathcal{F}} \frac{1}{T} \sum_{t=1}^T f(x_t) \right] \rightarrow \inf_{f \in \mathcal{F}} \mathbb{E}_{x \sim p} [f(x)]$$

and this rate is uniform for all distributions. Hence we have that

$$\sup_p \left\{ \mathbb{E}_{x_1, \dots, x_T \sim p} \left[ \frac{1}{T} \sum_{t=1}^T \mathbb{E}_{f \sim s_t(x_1, \dots, x_{t-1})} \mathbb{E}_{x \sim p} [f(x)] - \inf_{f \in \mathcal{F}} \frac{1}{T} \sum_{t=1}^T f(x_t) \right] \right\} = o(1)$$

We conclude that if the problem is learnable in the i.i.d. batch sense then

$$\begin{aligned} o(T) &= \sup_p \mathbb{E}_{x_1, \dots, x_T \sim p} \left[ \sum_{t=1}^T \mathbb{E}_{f \sim s_t(x_1, \dots, x_{t-1})} \mathbb{E}_{x \sim p} [f(x)] - \inf_{f \in \mathcal{F}} \sum_{t=1}^T f(x_t) \right] \\ &= \sup_p \mathbb{E}_{x_1, \dots, x_T \sim p} \left[ \sum_{t=1}^T \mathbb{E}_{f_t \sim s_t(x_1, \dots, x_{t-1})} f_t(x_t) - \inf_{f \in \mathcal{F}} \sum_{t=1}^T f(x_t) \right] \\ &= \sup_p \mathbb{E}_{x_1, \dots, x_T \sim p} \mathbb{E}_{f_1 \sim s_1} \dots \mathbb{E}_{f_T \sim s_T(x_1, \dots, x_{T-1})} \left\{ \sum_{t=1}^T f_t(x_t) - \inf_{f \in \mathcal{F}} \sum_{t=1}^T f(x_t) \right\} \\ &\geq \mathcal{V}_T^{\text{blind}} \end{aligned} \tag{28}$$

Thus we have shown that if a problem is learnable in the batch sense then it is learnable versus all i.i.d. adversaries in the online sense, provided that the distribution is not known to the player.  $\square$

**Proof of Lemma 15.** The first statement follows from the well-known classical symmetrization argument:

$$\begin{aligned}
\mathcal{V}_T^{\text{batch, sup}} &= \inf_{\hat{f}} \sup_{p_{X \times Y}} \left\{ \mathbb{E}|y - \hat{f}(x)| - \inf_{f \in \mathcal{F}} \mathbb{E}|y - f(x)| \right\} \\
&\leq \sup_{p_{X \times Y}} \left\{ \mathbb{E}|y - \tilde{f}(x)| - \inf_{f \in \mathcal{F}} \mathbb{E}|y - f(x)| \right\} \\
&\leq 2 \sup_{p_{X \times Y}} \mathbb{E} \sup_{f \in \mathcal{F}} \left| \frac{1}{T} \sum_{t=1}^T |y_t - f(x_t)| - \mathbb{E}|y - f(x)| \right| \\
&\leq 4 \sup_{p_X} \mathbb{E}_{x_{1:T}} \mathbb{E}_{\epsilon_{1:T}} \sup_{f \in \mathcal{F}} \frac{1}{T} \sum_{t=1}^T \epsilon_t f(x_t)
\end{aligned}$$

where the first inequality is obtained by choosing the empirical minimizer  $\tilde{f}$  as an estimator.

The second inequality of the Lemma follows from the lower bound proved in Section D. Lemma 20 implies that the game with i.i.d. restrictions  $\mathcal{P}_t = \{p_X \times U_Y\}$  for all  $t$  satisfies

$$\mathcal{V}_T^{\text{sup}}(\{p_X \times U_Y\}) \geq \mathfrak{R}_T(\mathcal{F}, p_X)$$

for any  $p_X$ .

Now, clearly, the distribution-blind supervised game is harder than the game with the knowledge of the distribution. That is,

$$\sup_{p_{X \times Y}} \mathcal{V}_T^{\text{sup}}(\{p_{X \times Y}\}) \leq \mathcal{V}_T^{\text{blind, sup}}$$

□

## C Application: Hybrid Learning

In Section B, we studied the relationship between batch and online learnability in the i.i.d. setting, focusing on the supervised case in Section B.1. We now provide a more in-depth study of the value of the supervised game beyond the i.i.d. setting.

As shown in [10], the value of the supervised game with the *worst-case adversary* is upper and lower bounded (to within  $O(\log^{3/2} T)$ ) by *sequential Rademacher complexity*. This complexity can be linear in  $T$  if the function class has infinite Littlestone’s dimension, rendering worst-case learning futile. This is the case with a class of threshold functions on an interval, which has a Vapnik-Chervonenkis dimension of 1. Surprisingly, it was shown in [6] that for the classification problem with i.i.d.  $x$ ’s and adversarial labels  $y$ , online regret can be bounded whenever VC dimension of the class is finite. This suggests that it is the manner in which  $x$  is chosen that plays the decisive role in supervised learning. We indeed show that this is the case. Irrespective of the way the labels are chosen, if  $x_t$  are chosen i.i.d. then regret is (to within a constant) given by the classical Rademacher complexity. If  $x_t$ ’s are chosen adversarially, it is (to within a logarithmic factor) given by the sequential Rademacher complexity.

We remark that the algorithm of [6] is “distribution-blind” in the sense of last section. The results we present below are for non-blind games. While the equivalence of blind and non-blind learning was shown in the previous section for the i.i.d. supervised case, we hypothesize that it holds for the hybrid supervised learning scenario as well.

Let the loss class be  $\phi(\mathcal{F}) = \{(x, y) \mapsto \phi(f(x), y) : f \in \mathcal{F}\}$  for some Lipschitz function  $\phi : \mathbb{R} \times \mathcal{Y} \mapsto \mathbb{R}$  (i.e.  $\phi(f(x), y) = |f(x) - y|$ ). Let  $\mathcal{P}_{1:T}$  be the restrictions on the adversary. Theorem 3 then states that

$$\mathcal{V}_T^{\text{sup}}(\mathcal{P}_{1:T}) \leq 2 \sup_{\mathbf{p} \in \mathfrak{P}} \mathfrak{R}_T(\phi(\mathcal{F}), \mathbf{p})$$

where the supremum is over all joint distributions  $\mathbf{p}$  on the sequences  $((x_1, y_1), \dots, (x_T, y_T))$ , such that  $\mathbf{p}$  satisfies the restrictions  $\mathcal{P}_{1:T}$ . The idea is to pass from a complexity of  $\phi(\mathcal{F})$  to that of the class  $\mathcal{F}$  via a Lipschitz composition lemma, and then note that the resulting complexity does not

depend on  $y$ -variables. If this can be done, the complexity associated only with the choice of  $x$  is then an upper bound on the value of the game. The results of this section, therefore, hold whenever a Lipschitz composition lemma can be proved for the distribution-dependent Rademacher complexity.

The following lemma gives an upper bound on the distribution-dependent Rademacher complexity in the “hybrid” scenario, i.e. the distribution of  $x_t$ ’s is i.i.d. from a fixed distribution  $p$  but the distribution of  $y_t$ ’s is arbitrary (recall that adversarial choice of the player translates into vacuous restrictions  $\mathcal{P}_t$  on the mixed strategies). Interestingly, the upper bound is a blend of the classical Rademacher complexity (on the  $x$ -variable) and the worst-case sequential Rademacher complexity for the  $y$ -variable. This captures the hybrid nature of the problem.

**Lemma 17.** Fix a class  $\mathcal{F} \subseteq \mathbb{R}^{\mathcal{X}}$  and a function  $\phi : \mathbb{R} \times \mathcal{Y} \mapsto \mathbb{R}$ . Given a distribution  $p$  over  $\mathcal{X}$ , let  $\mathfrak{P}$  consist of all joint distributions  $\mathbf{p}$  such that the conditional distribution  $p_t^{x,y}(x_t, y_t | x^{t-1}, y^{t-1}) = p(x_t) \times p_t(y_t | x^{t-1}, y^{t-1}, x_t)$  for some conditional distribution  $p_t$ . Then,

$$\sup_{\mathbf{p} \in \mathfrak{P}} \mathfrak{R}_T(\phi(\mathcal{F}), \mathbf{p}) \leq \mathbb{E}_{x_1, \dots, x_T \sim p} \sup_{\mathbf{y}} \mathbb{E}_{\epsilon} \left[ \sup_{f \in \mathcal{F}} \sum_{t=1}^T \epsilon_t \phi(f(x_t), \mathbf{y}_t(\epsilon)) \right].$$

Armed with this result, we can appeal to the following Lipschitz composition lemma. It says that the distribution-dependent sequential Rademacher complexity for the hybrid scenario with a Lipschitz loss can be upper bounded via the classical Rademacher complexity of the function class on the  $x$ -variable only. That is, we can “erase” the Lipschitz loss function together with the (adversarially chosen)  $y$  variable. The lemma is an analogue of the classical contraction principle initially proved by Ledoux and Talagrand [7] for the i.i.d. process.

**Lemma 18.** Fix a class  $\mathcal{F} \subseteq [-1, 1]^{\mathcal{X}}$  and a function  $\phi : [-1, 1] \times \mathcal{Y} \mapsto \mathbb{R}$ . Assume, for all  $y \in \mathcal{Y}$ ,  $\phi(\cdot, y)$  is a Lipschitz function with a constant  $L$ . Let  $\mathfrak{P}$  be as in Lemma 17. Then, for any  $\mathbf{p} \in \mathfrak{P}$ ,

$$\mathfrak{R}_T(\phi(\mathcal{F}), \mathbf{p}) \leq L \mathfrak{R}_T(\mathcal{F}, p).$$

Lemma 17 in tandem with Lemma 18 imply that the value of the game with i.i.d.  $x$ ’s and adversarial  $y$ ’s is upper bounded by the classical Rademacher complexity.

For the case of adversarially-chosen  $x$ ’s and (potentially) adversarially chosen  $y$ ’s, the necessary Lipschitz composition lemma is proved in [10] with an extra factor of  $O(\log^{3/2} T)$ . We summarize the results in the following Corollary.

**Corollary 19.** For stochastic-adversarial supervised learning with absolute loss,

- (1) If  $x_t$  are chosen adversarially, then irrespective of the way  $y_t$ ’s are chosen,

$$\mathcal{V}_T^{\text{sup}} \leq 2\mathfrak{R}(\mathcal{F}) \times O(\log^{3/2}(T)),$$

where  $\mathfrak{R}(\mathcal{F})$  is the (worst-case) sequential Rademacher complexity [10]. A matching lower bound of  $\mathfrak{R}(\mathcal{F})$  is attained by choosing  $y_t$ ’s as i.i.d. Rademacher random variables.

- (2) If  $x_t$  are chosen i.i.d. from  $p$ , then irrespective of the way  $y_t$ ’s are chosen,

$$\mathcal{V}_T^{\text{sup}} \leq 2\mathfrak{R}(\mathcal{F}, p),$$

where  $\mathfrak{R}(\mathcal{F}, p)$  defined in (6) is the classical Rademacher complexity. The matching lower bound of  $\mathfrak{R}(\mathcal{F}, p)$  is obtained by choosing  $y_t$ ’s as i.i.d. Rademacher random variables.

The lower bounds stated in Corollary 19 are proved in the Appendix.

## C.1 Proofs

**Proof of Lemma 17.** We want to bound the supremum (as  $\mathbf{p}$  ranges over  $\mathfrak{P}$ ) of the distribution-dependent Rademacher complexity:

$$\sup_{\mathbf{p} \in \mathfrak{P}} \mathfrak{R}_T(\phi(\mathcal{F}), \mathbf{p}) = \sup_{\mathbf{p} \in \mathfrak{P}} \mathbb{E}_{((\mathbf{x}, \mathbf{y}), (\mathbf{x}', \mathbf{y}')) \sim \mathbf{p}} \mathbb{E}_{\epsilon} \left[ \sup_{f \in \mathcal{F}} \sum_{t=1}^T \epsilon_t \phi(f(\mathbf{x}_t(\epsilon)), \mathbf{y}_t(\epsilon)) \right]$$



for an associated process  $\rho$  defined in Section 3. To elucidate the random process  $\rho$ , we expand the succinct tree notation and write the above quantity as

$$\begin{aligned} \sup_{\mathbf{p}} \mathbb{E}_{x_1, x'_1 \sim p} \mathbb{E}_{y_1 \sim p_1(\cdot|x_1)} \mathbb{E}_{\epsilon_1} \mathbb{E}_{x_2, x'_2 \sim p} \mathbb{E}_{y_2 \sim p_2(\cdot|\chi_1(\epsilon_1), x_2)} \mathbb{E}_{\epsilon_2} \dots \\ \dots \mathbb{E}_{x_T, x'_T \sim p} \mathbb{E}_{y_T \sim p_T(\cdot|\chi_1(\epsilon_1), \dots, \chi_{T-1}(\epsilon_{T-1}), x_T)} \mathbb{E}_{\epsilon_T} \left[ \sup_{f \in \mathcal{F}} \sum_{t=1}^T \epsilon_t \phi(f(x_t), y_t) \right] \end{aligned}$$

where  $\chi_t(\epsilon_t)$  now selects the pair  $(x_t, y_t)$  or  $(x'_t, y'_t)$ . By passing to the supremum over  $y_t, y'_t$  for all  $t$ , we arrive at

$$\begin{aligned} \sup_{\mathbf{p} \in \mathfrak{P}} \mathfrak{R}_T(\phi(\mathcal{F}), \mathbf{p}) &\leq \sup_{\mathbf{p}} \mathbb{E}_{x_1, x'_1 \sim p} \sup_{y_1, y'_1} \mathbb{E}_{\epsilon_1} \mathbb{E}_{x_2, x'_2 \sim p} \sup_{y_2, y'_2} \mathbb{E}_{\epsilon_2} \dots \mathbb{E}_{x_T, x'_T \sim p} \sup_{y_T, y'_T} \mathbb{E}_{\epsilon_T} \left[ \sup_{f \in \mathcal{F}} \sum_{t=1}^T \epsilon_t \phi(f(x_t), y_t) \right] \\ &= \mathbb{E}_{x_1 \sim p} \sup_{y_1} \mathbb{E}_{\epsilon_1} \mathbb{E}_{x_2 \sim p} \sup_{y_2} \mathbb{E}_{\epsilon_2} \dots \mathbb{E}_{x_T \sim p} \sup_{y_T} \mathbb{E}_{\epsilon_T} \left[ \sup_{f \in \mathcal{F}} \sum_{t=1}^T \epsilon_t \phi(f(x_t), y_t) \right] \end{aligned}$$

where the sequence of  $x'_t$ 's and  $y'_t$ 's has been eliminated. By moving the expectations over  $x_t$ 's outside the suprema (and thus increasing the value), we upper bound the above by:

$$\begin{aligned} &\leq \mathbb{E}_{x_1, \dots, x_T \sim p} \sup_{y_1} \mathbb{E}_{\epsilon_1} \sup_{y_2} \mathbb{E}_{\epsilon_2} \dots \sup_{y_T} \mathbb{E}_{\epsilon_T} \left[ \sup_{f \in \mathcal{F}} \sum_{t=1}^T \epsilon_t \phi(f(x_t), y_t) \right] \\ &= \mathbb{E}_{x_1, \dots, x_T \sim p} \sup_{\mathbf{y}} \mathbb{E}_{\epsilon} \left[ \sup_{f \in \mathcal{F}} \sum_{t=1}^T \epsilon_t \phi(f(x_t), \mathbf{y}_t(\epsilon)) \right] \end{aligned}$$

□

**Proof of Lemma 18.** First without loss of generality assume  $L = 1$ . The general case follow from this by simply scaling  $\phi$  appropriately. By Lemma 17,

$$\mathfrak{R}_T(\phi(\mathcal{F}), \mathbf{p}) \leq \mathbb{E}_{x_1, \dots, x_T \sim p} \sup_{\mathbf{y}} \mathbb{E}_{\epsilon} \left[ \sup_{f \in \mathcal{F}} \sum_{t=1}^T \epsilon_t \phi(f(x_t), \mathbf{y}_t(\epsilon)) \right] \quad (29)$$

The proof proceeds by sequentially using the Lipschitz property of  $\phi(f(x_t), \mathbf{y}_t(\epsilon))$  for decreasing  $t$ , starting from  $t = T$ . Towards this end, define

$$R_t = \mathbb{E}_{x_1, \dots, x_T \sim p} \sup_{\mathbf{y}} \mathbb{E}_{\epsilon} \left[ \sup_{f \in \mathcal{F}} \sum_{s=1}^t \epsilon_s \phi(f(x_s), \mathbf{y}_s(\epsilon)) + \sum_{s=t+1}^T \epsilon_s f(x_s) \right].$$

Since the mappings  $\mathbf{y}_{t+1}, \dots, \mathbf{y}_T$  do not enter the expression, the supremum is in fact taken over the trees  $\mathbf{y}$  of depth  $t$ . Note that  $R_0 = \mathfrak{R}(\mathcal{F}, p)$  is precisely the classical Rademacher complexity (without the dependence on  $\mathbf{y}$ ), while  $R_T$  is the upper bound on  $\mathfrak{R}_T(\phi(\mathcal{F}), \mathbf{p})$  in Eq. (29). We need to show  $R_T \leq R_0$  and we will show this by proving  $R_t \leq R_{t-1}$  for all  $t \in [T]$ . So, let us fix  $t \in [T]$  and start with  $R_t$ :

$$\begin{aligned} R_t &= \mathbb{E}_{x_1, \dots, x_T \sim p} \sup_{\mathbf{y}} \mathbb{E}_{\epsilon} \left[ \sup_{f \in \mathcal{F}} \sum_{s=1}^t \epsilon_s \phi(f(x_s), \mathbf{y}_s(\epsilon)) + \sum_{s=t+1}^T \epsilon_s f(x_s) \right] \\ &= \mathbb{E}_{x_1, \dots, x_T \sim p} \sup_{y_1} \mathbb{E}_{\epsilon_1} \dots \sup_{y_t} \mathbb{E}_{\epsilon_t} \mathbb{E}_{\epsilon_{t+1:T}} \left[ \sup_{f \in \mathcal{F}} \sum_{s=1}^t \epsilon_s \phi(f(x_s), y_s) + \sum_{s=t+1}^T \epsilon_s f(x_s) \right] \\ &= \mathbb{E}_{x_1, \dots, x_T \sim p} \sup_{y_1} \mathbb{E}_{\epsilon_1} \dots \sup_{y_t} \mathbb{E}_{\epsilon_{t+1:T}} S(x_{1:T}, y_{1:t}, \epsilon_{1:t-1}, \epsilon_{t+1:T}) \end{aligned}$$



with

$$\begin{aligned}
S(x_{1:T}, y_{1:t}, \epsilon_{1:t-1}, \epsilon_{t+1:T}) &= \mathbb{E}_{\epsilon_t} \left[ \sup_{f \in \mathcal{F}} \sum_{s=1}^t \epsilon_s \phi(f(x_s), y_s) + \sum_{s=t+1}^T \epsilon_s f(x_s) \right] \\
&= \frac{1}{2} \left\{ \sup_{f \in \mathcal{F}} \sum_{s=1}^{t-1} \epsilon_s \phi(f(x_s), y_s) + \phi(f(x_t), y_t) + \sum_{s=t+1}^T \epsilon_s f(x_s) \right\} \\
&\quad + \frac{1}{2} \left\{ \sup_{f \in \mathcal{F}} \sum_{s=1}^{t-1} \epsilon_s \phi(f(x_s), y_s) - \phi(f(x_t), y_t) + \sum_{s=t+1}^T \epsilon_s f(x_s) \right\}
\end{aligned}$$

The two suprema can be combined to yield

$$\begin{aligned}
2S(x_{1:T}, y_{1:t}, \epsilon_{1:t-1}, \epsilon_{t+1:T}) &= \sup_{f, g \in \mathcal{F}} \left\{ \sum_{s=1}^{t-1} \epsilon_s (\phi(f(x_s), y_s) + \phi(g(x_s), y_s)) + \phi(f(x_t), y_t) - \phi(g(x_t), y_t) + \sum_{s=t+1}^T \epsilon_s (f(x_s) + g(x_s)) \right\} \\
&\leq \sup_{f, g \in \mathcal{F}} \left\{ \sum_{s=1}^{t-1} \epsilon_s (\phi(f(x_s), y_s) + \phi(g(x_s), y_s)) + |f(x_t) - g(x_t)| + \sum_{s=t+1}^T \epsilon_s (f(x_s) + g(x_s)) \right\} \quad (*) \\
&= \sup_{f, g \in \mathcal{F}} \left\{ \sum_{s=1}^{t-1} \epsilon_s (\phi(f(x_s), y_s) + \phi(g(x_s), y_s)) + f(x_t) - g(x_t) + \sum_{s=t+1}^T \epsilon_s (f(x_s) + g(x_s)) \right\} \quad (**)
\end{aligned}$$

The first inequality is due to the Lipschitz property, while the last equality needs a justification. First, it is clear that the term (\*\*) is upper bounded by (\*). The reverse direction can be argued as follows. Let a pair  $(f^*, g^*)$  achieve the supremum in (\*). Suppose first that  $f^*(x_t) \geq g^*(x_t)$ . Then  $(f^*, g^*)$  provides the same value in (\*\*) and, hence, the supremum is no less than the supremum in (\*). If, on the other hand,  $f^*(x_t) < g^*(x_t)$ , then the pair  $(g^*, f^*)$  provides the same value in (\*\*).

We conclude that

$$\begin{aligned}
S(x_{1:T}, y_{1:t}, \epsilon_{1:t-1}, \epsilon_{t+1:T}) &\leq \frac{1}{2} \sup_{f, g \in \mathcal{F}} \left\{ \sum_{s=1}^{t-1} \epsilon_s (\phi(f(x_s), y_s) + \phi(g(x_s), y_s)) + f(x_t) - g(x_t) + \sum_{s=t+1}^T \epsilon_s (f(x_s) + g(x_s)) \right\} \\
&= \frac{1}{2} \left\{ \sup_{f \in \mathcal{F}} \sum_{s=1}^{t-1} \epsilon_s \phi(f(x_s), y_s) + f(x_t) + \sum_{s=t+1}^T \epsilon_s f(x_s) \right\} + \frac{1}{2} \left\{ \sup_{f \in \mathcal{F}} \sum_{s=1}^{t-1} \epsilon_s \phi(f(x_s), y_s) - f(x_t) + \sum_{s=t+1}^T \epsilon_s f(x_s) \right\} \\
&= \mathbb{E}_{\epsilon_t} \sup_{f \in \mathcal{F}} \left\{ \sum_{s=1}^{t-1} \epsilon_s \phi(f(x_s), y_s) + \epsilon_t f(x_t) + \sum_{s=t+1}^T \epsilon_s f(x_s) \right\}
\end{aligned}$$

Thus,

$$\begin{aligned}
R_t &= \mathbb{E}_{x_1, \dots, x_T \sim \mathcal{P}} \sup_{y_1} \mathbb{E}_{\epsilon_1} \dots \sup_{y_t} \mathbb{E}_{\epsilon_{t+1:T}} S(x_{1:T}, y_{1:t}, \epsilon_{1:t-1}, \epsilon_{t+1:T}) \\
&\leq \mathbb{E}_{x_1, \dots, x_T \sim \mathcal{P}} \sup_{y_1} \mathbb{E}_{\epsilon_1} \dots \sup_{y_t} \mathbb{E}_{\epsilon_{t:T}} \sup_{f \in \mathcal{F}} \left\{ \sum_{s=1}^{t-1} \epsilon_s \phi(f(x_s), y_s) + \sum_{s=t}^T \epsilon_s f(x_s) \right\} \\
&= \mathbb{E}_{x_1, \dots, x_T \sim \mathcal{P}} \sup_{y_1} \mathbb{E}_{\epsilon_1} \dots \sup_{y_{t-1}} \mathbb{E}_{\epsilon_{t-1}} \mathbb{E}_{\epsilon_{t:T}} \sup_{f \in \mathcal{F}} \left\{ \sum_{s=1}^{t-1} \epsilon_s \phi(f(x_s), y_s) + \sum_{s=t}^T \epsilon_s f(x_s) \right\} \\
&= R_{t-1}
\end{aligned}$$

where we have removed the supremum over  $y_t$  as it no longer appears in the objective. This concludes the proof.  $\square$

## D Lower Bounds

We now give two lower bounds on the value  $\mathcal{V}_T^{\text{sup}}$ , defined with the absolute value loss function  $\phi(f(x), y) = |f(x) - y|$ . The lower bounds hold whenever the adversary's restrictions  $\{\mathcal{P}_t\}_{t=1}^T$  allow the labels to be i.i.d. coin flips. That is, for the purposes of proving the lower bound, it is enough to choose a joint probability  $\mathbf{p}$  (an oblivious strategy for the adversary) such that each conditional probability distribution on the pair  $(x, y)$  is of the form  $p_t(x|x_1, \dots, x_{t-1}) \times b(y)$  with  $b(-1) = b(1) = 1/2$ . Pick any such  $\mathbf{p}$ .

Our first lower bound will hold whenever the restrictions  $\mathcal{P}_t$  are history-independent. That is,  $\mathcal{P}_t(x_{1:t-1}) = \mathcal{P}_t(x'_{1:t-1})$  for any  $x_{1:t-1}, x'_{1:t-1} \in \mathcal{X}^{t-1}$ . Since the worst-case (all distributions) and i.i.d. (single distribution) are both history-independent restrictions, the lemma can be used to provide lower bounds for these cases. The second lower bound holds more generally, yet it is weaker than that of Lemma 20.

**Lemma 20.** *Let  $\mathfrak{P}$  be the set of all  $\mathbf{p}$  satisfying the history-independent restrictions  $\{\mathcal{P}_t\}$  and  $\mathfrak{P}' \subseteq \mathfrak{P}$  the subset that allows the label  $y_t$  to be an i.i.d. Rademacher random variable for each  $t$ . Then*

$$\mathcal{V}_T^{\text{sup}}(\mathcal{P}_{1:T}) \geq \sup_{\mathbf{p} \in \mathfrak{P}'} \mathfrak{R}_T(\mathcal{F}, \mathbf{p})$$

In particular, Lemma 20 gives matching lower bounds for Corollary 19.

**Lemma 21.** *Let  $\mathfrak{P}$  be the set of all  $\mathbf{p}$  satisfying the restrictions  $\{\mathcal{P}_t\}$  and let  $\mathfrak{P}' \subseteq \mathfrak{P}$  be the subset that allows the label  $y_t$  to be an i.i.d. Rademacher random variable for each  $t$ . Then*

$$\mathcal{V}_T^{\text{sup}}(\mathcal{P}_{1:T}) \geq \sup_{\mathbf{p} \in \mathfrak{P}'} \mathbb{E}_{(\mathbf{x}, \mathbf{x}') \sim \rho} \mathbb{E}_{\epsilon} \left[ \sup_{f \in \mathcal{F}} \sum_{t=1}^T \epsilon_t f(\mathbf{x}_t(-\mathbf{1})) \right]$$

**Proof of Lemma 20.** Notice that  $\mathbf{p}$  defines the stochastic process  $\rho$  as in (4) where the i.i.d.  $y_t$ 's now play the role of the  $\epsilon_t$ 's. More precisely, at each time  $t$ , two copies  $x_t$  and  $x'_t$  are drawn from the marginal distribution  $p_t(\cdot | \chi_1(y_1), \dots, \chi_{t-1}(y_{t-1}))$ , then a Rademacher random variable  $y_t$  is drawn i.i.d. and it indicates whether  $x_t$  or  $x'_t$  is to be used in the subsequent conditional distributions via the selector  $\chi_t(y_t)$ . This is a well-defined process obtained from  $\mathbf{p}$  that produces a sequence of  $(x_1, x'_1, y_1), \dots, (x_T, x'_T, y_T)$ . The  $x'$  sequence is only used to define conditional distributions below, while the sequence  $(x_1, y_1), \dots, (x_T, y_T)$  is presented to the player. Since restrictions are history-independent, the stochastic process is following the protocol which defines  $\rho$ .

For any  $\mathbf{p}$  of the form described above, the value of the game in (2) can be lower-bounded via Proposition 2.

$$\begin{aligned} \mathcal{V}_T^{\text{sup}} &\geq \mathbb{E} \left[ \sum_{t=1}^T \inf_{f \in \mathcal{F}} \mathbb{E}_{(x_t, y_t)} \left[ |y_t - f(x_t)| \mid (x, y)_{1:t-1} \right] - \inf_{f \in \mathcal{F}} \sum_{t=1}^T |y_t - f(x_t)| \right] \\ &= \mathbb{E} \left[ \sum_{t=1}^T 1 - \inf_{f \in \mathcal{F}} \sum_{t=1}^T |y_t - f(x_t)| \right] \end{aligned}$$

A short calculation shows that the last quantity is equal to

$$\mathbb{E} \sup_{f \in \mathcal{F}} \sum_{t=1}^T (1 - |y_t - f(x_t)|) = \mathbb{E} \sup_{f \in \mathcal{F}} \sum_{t=1}^T y_t f(x_t).$$

The last expectation can be expanded to show the stochastic process:

$$\begin{aligned} &\mathbb{E}_{x_1, x'_1 \sim p_1} \mathbb{E}_{y_1} \mathbb{E}_{x_2, x'_2 \sim p_2(\cdot | \chi_1(y_1))} \mathbb{E}_{y_2} \dots \mathbb{E}_{x_T, x'_T \sim p_T(\cdot | \chi_1(y_1), \dots, \chi_{T-1}(y_{T-1}))} \mathbb{E}_{y_T} \sup_{f \in \mathcal{F}} \sum_{t=1}^T y_t f(x_t) \\ &= \mathbb{E}_{(\mathbf{x}, \mathbf{x}') \sim \rho} \mathbb{E}_{\epsilon} \left[ \sup_{f \in \mathcal{F}} \sum_{t=1}^T \epsilon_t f(\mathbf{x}_t(\epsilon)) \right] \\ &= \mathfrak{R}_T(\mathcal{F}, \mathbf{p}) \end{aligned}$$

Since this lower bound holds for any  $\mathbf{p}$  which allows the labels to be independent  $\pm 1$  with probability  $1/2$ , we conclude the proof.  $\square$

**Proof of Lemma 21.** For the purposes of this proof, the adversary presents  $y_t$  an i.i.d. Rademacher random variable on each round. Unlike the previous lemma, only the  $\{x_t\}$  sequence is used for defining conditional distributions. Hence, the  $\mathbf{x}'$  tree is immaterial and the lower bound is only concerned with the left-most path. The rest of the proof is similar to that of Lemma 20:

$$\begin{aligned} \mathcal{V}_T^{\sup} &\geq \mathbb{E} \left[ \sum_{t=1}^T \inf_{f_t \in \mathcal{F}} \mathbb{E}_{(x_t, y_t)} \left[ |y_t - f_t(x_t)| \mid (x, y)_{1:t-1} \right] - \inf_{f \in \mathcal{F}} \sum_{t=1}^T |y_t - f(x_t)| \right] \\ &= \mathbb{E} \left[ \sum_{t=1}^T 1 - \inf_{f \in \mathcal{F}} \sum_{t=1}^T |y_t - f(x_t)| \right] \end{aligned}$$

As before, this expression is equal to

$$\begin{aligned} \mathbb{E} \sup_{f \in \mathcal{F}} \sum_{t=1}^T y_t f(x_t) &= \mathbb{E}_{x_1 \sim p_1} \mathbb{E}_{y_1} \mathbb{E}_{x_2 \sim p_2(\cdot | x_1)} \mathbb{E}_{y_2} \dots \mathbb{E}_{x_T \sim p_T(\cdot | x_1, \dots, x_{T-1})} \mathbb{E}_{y_T} \sup_{f \in \mathcal{F}} \sum_{t=1}^T y_t f(x_t) \\ &= \mathbb{E}_{(\mathbf{x}, \mathbf{x}') \sim \boldsymbol{\rho}} \mathbb{E}_{\epsilon} \left[ \sup_{f \in \mathcal{F}} \sum_{t=1}^T \epsilon_t f(\mathbf{x}_t(-\mathbf{1})) \right] \end{aligned}$$

$\square$
