# Supplementary material
Source: ML conference proceedings conference paper supplement (https://proceedings.neurips.cc/paper_files/paper/2011/hash/692f93be8c7a41525c0baf2076aecfb4-Abstract.html)
Supplement: Supplementary file 2 [file 692f93be8c7a41525c0baf2076aecfb4-Supplemental.zip]

Archive with 1 entries (1 files):
- all/Paper 991/stochastic-paper-supplement.pdf
